# Supplementary material
Source: publisher site journal article supplement (https://oneecosystem.pensoft.net/article/download/suppl/5752010/)
Supplement: Supplementary file 1

### ***Appendix C. Individual ES graphical outputs***

|                                         |
|-----------------------------------------|
| <b>Indication of ecosystem services</b> |
|-----------------------------------------|

**Provisioning ES:** P01 Biomass - Agricultural crops; P02 Timber and fibre; P03 Drinking water; P04 Freshwater; P05 Fish & Game / Wildfood

**Regulatory / maintenance ES:** R01 Air quality regulation; R02 Water quality regulation; R03 Erosion & natural hazard regulation; R04 Water flow regulation; R05 Local climate regulation; R06 Global climate regulation; R07 Biodiversity promotion; R08 Pollination; R09 Pest and disease control; R10 Soil formation

**Cultural ES:** C01 Recreation and tourism; C02 Landscape aesthetics; C03 Natural and cultural heritage.

## Box plots of ES

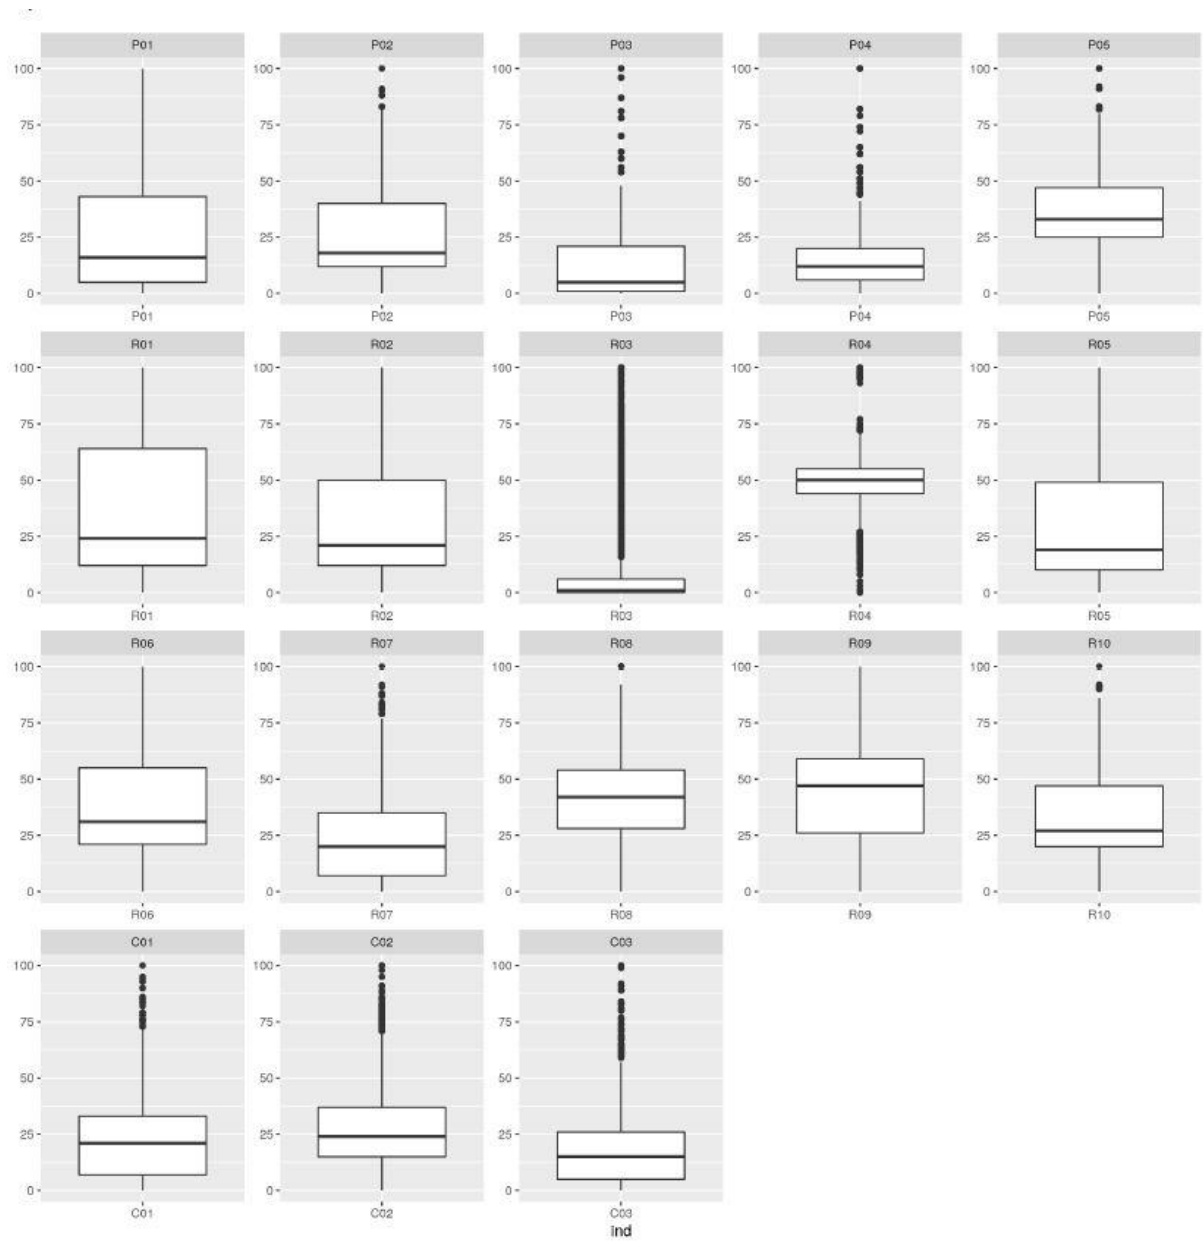

## Histograms of ES

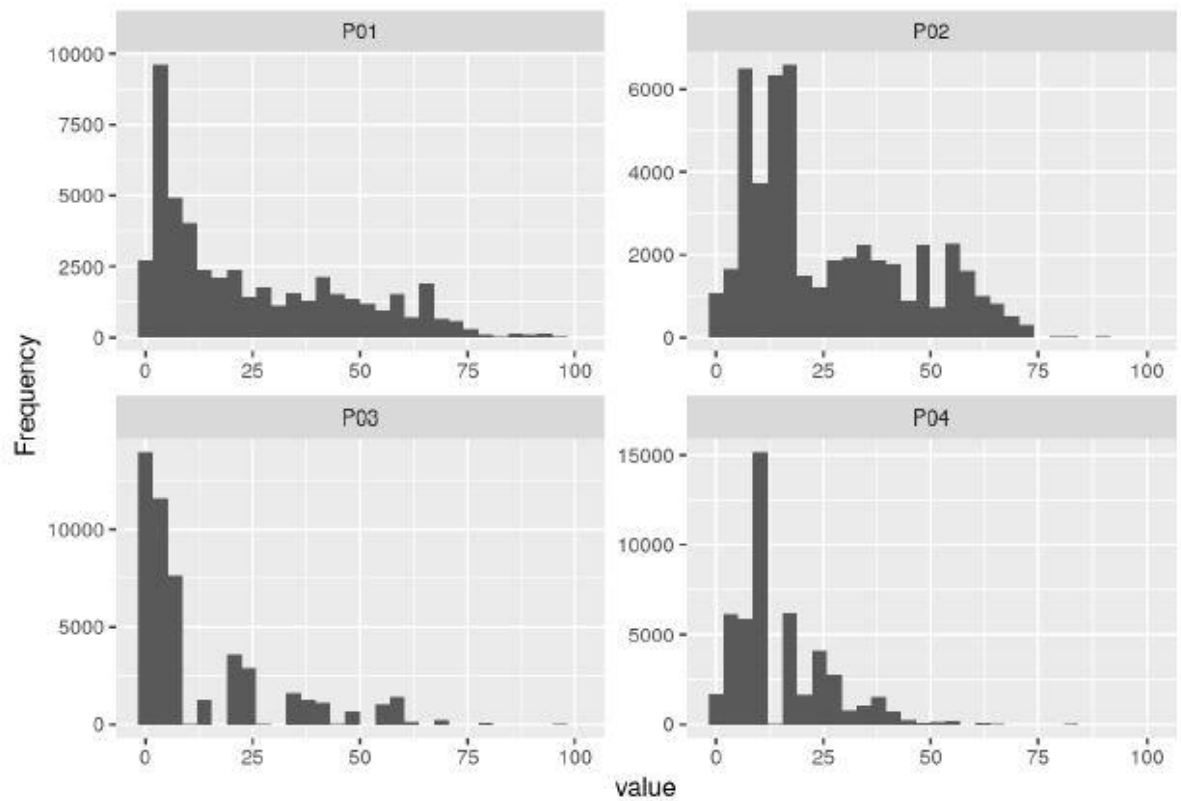

Page 1

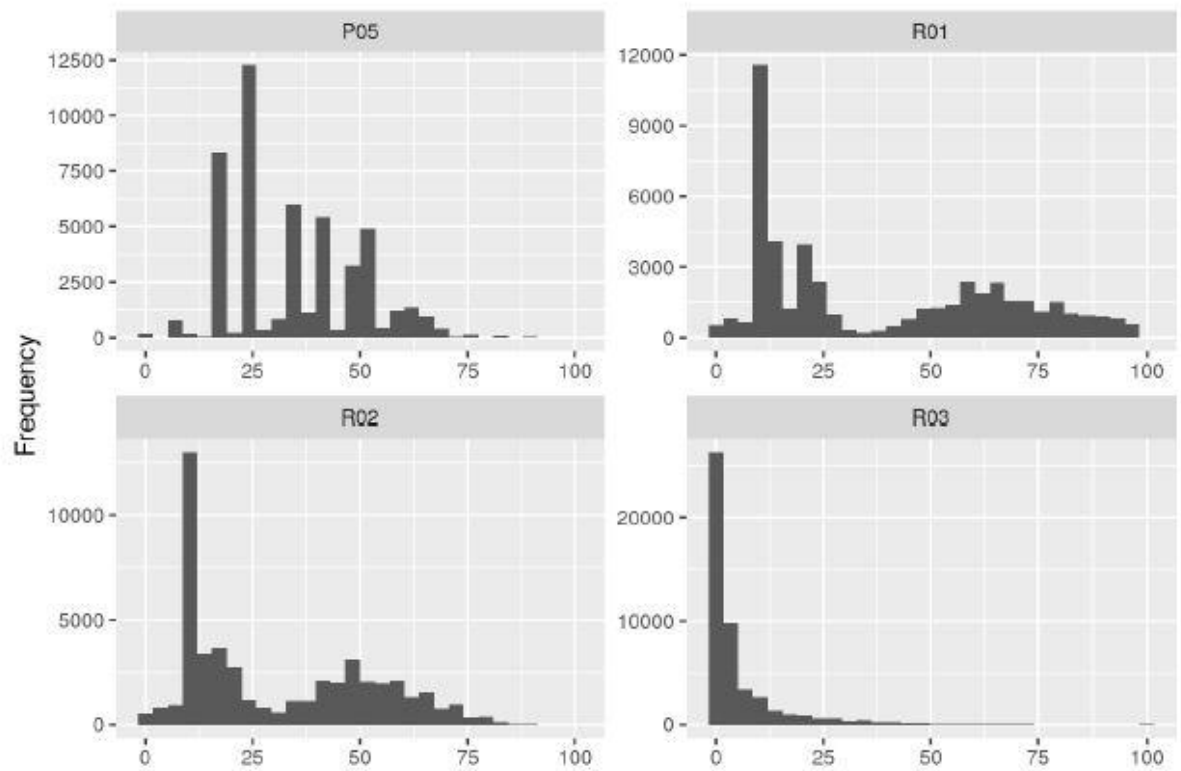

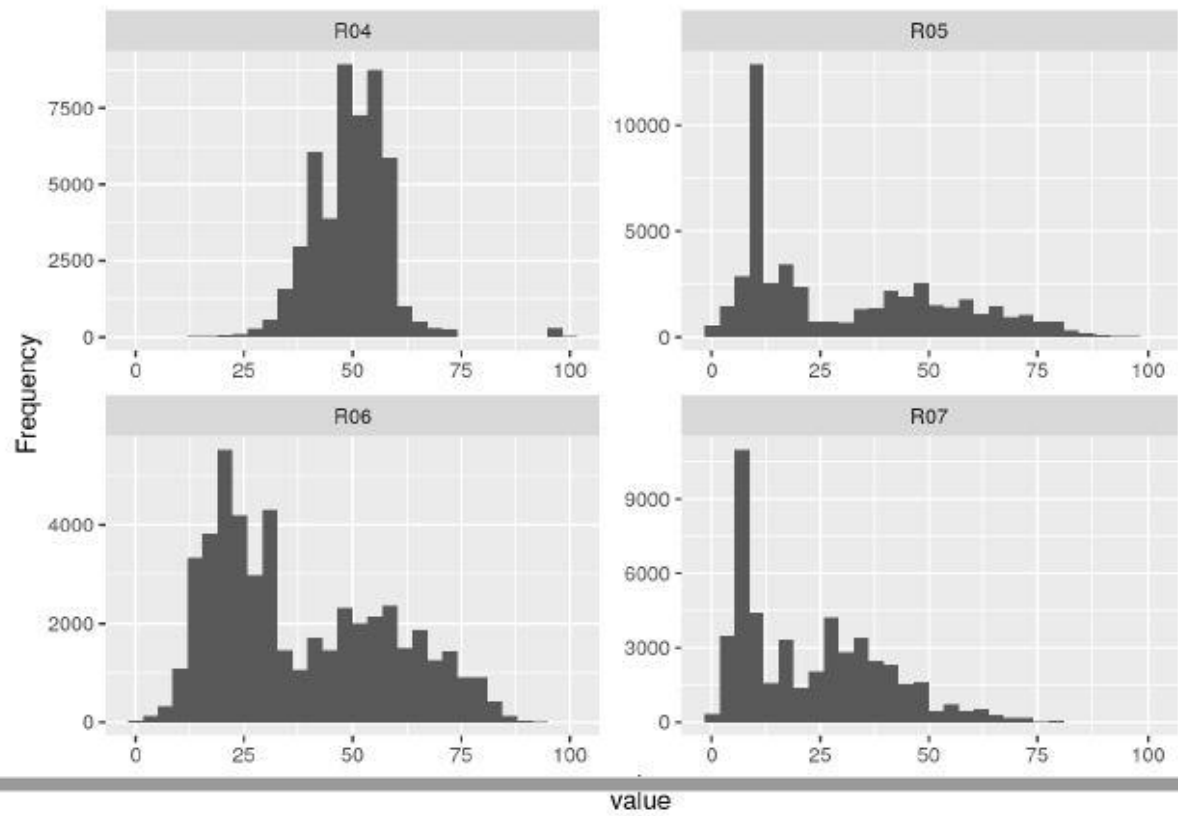

Page 3

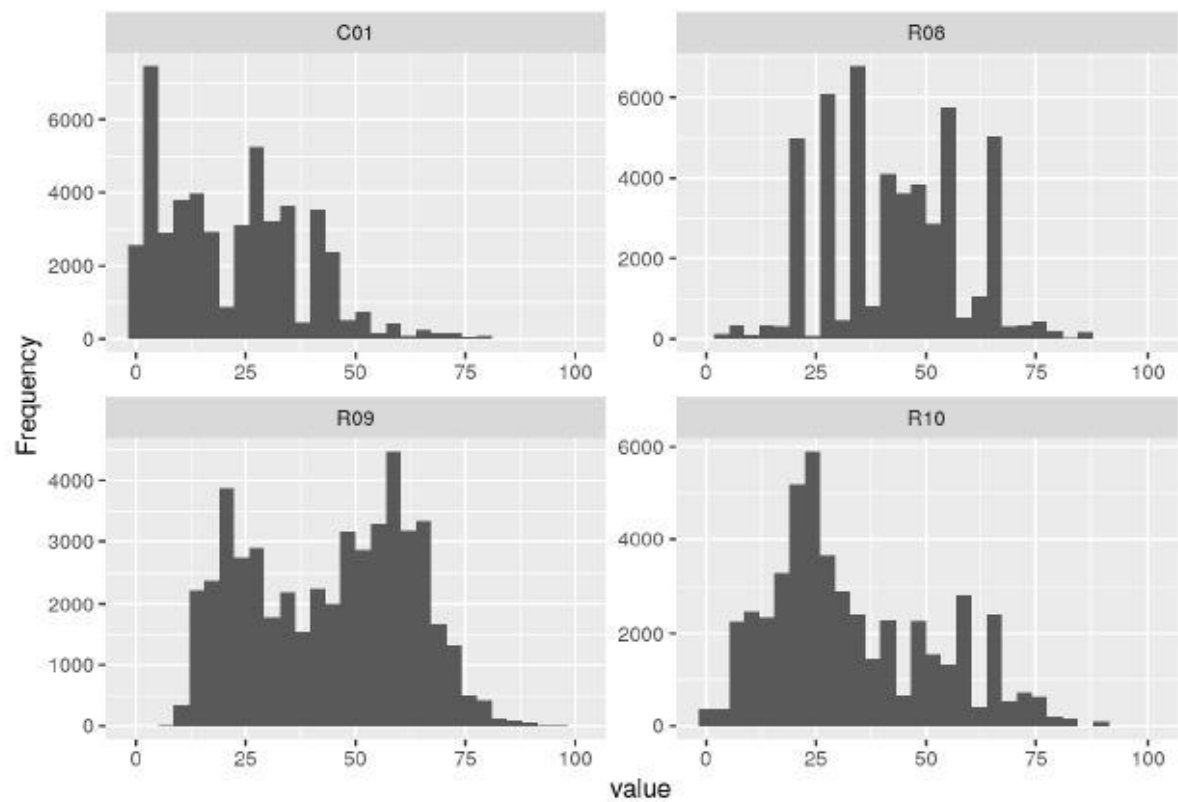

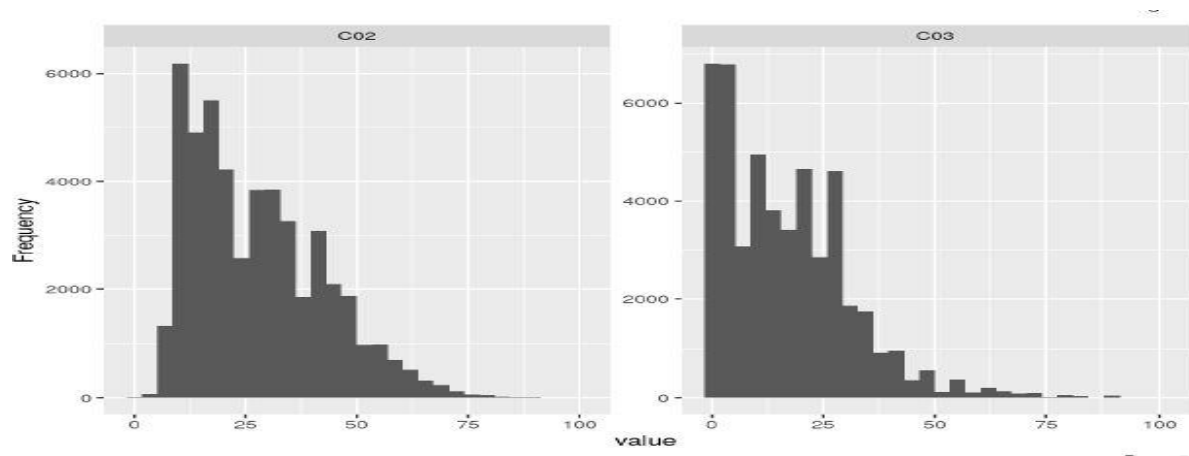

Maps of ES

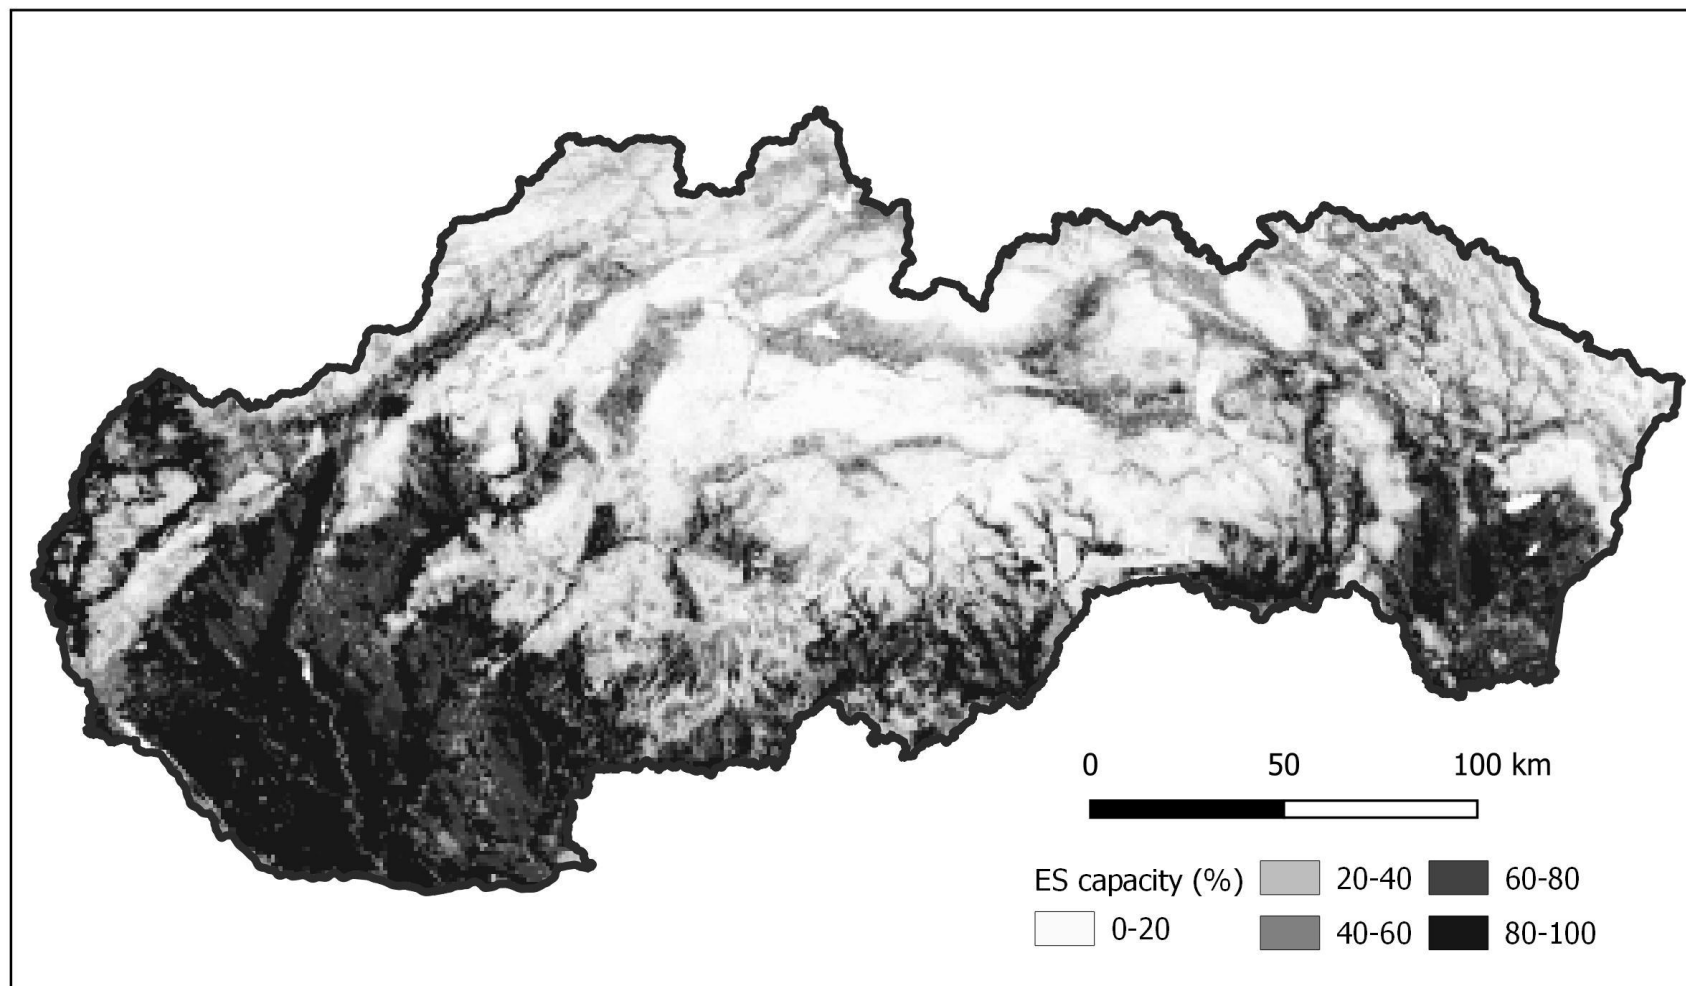

**P01 Biomass - Agricultural crops**

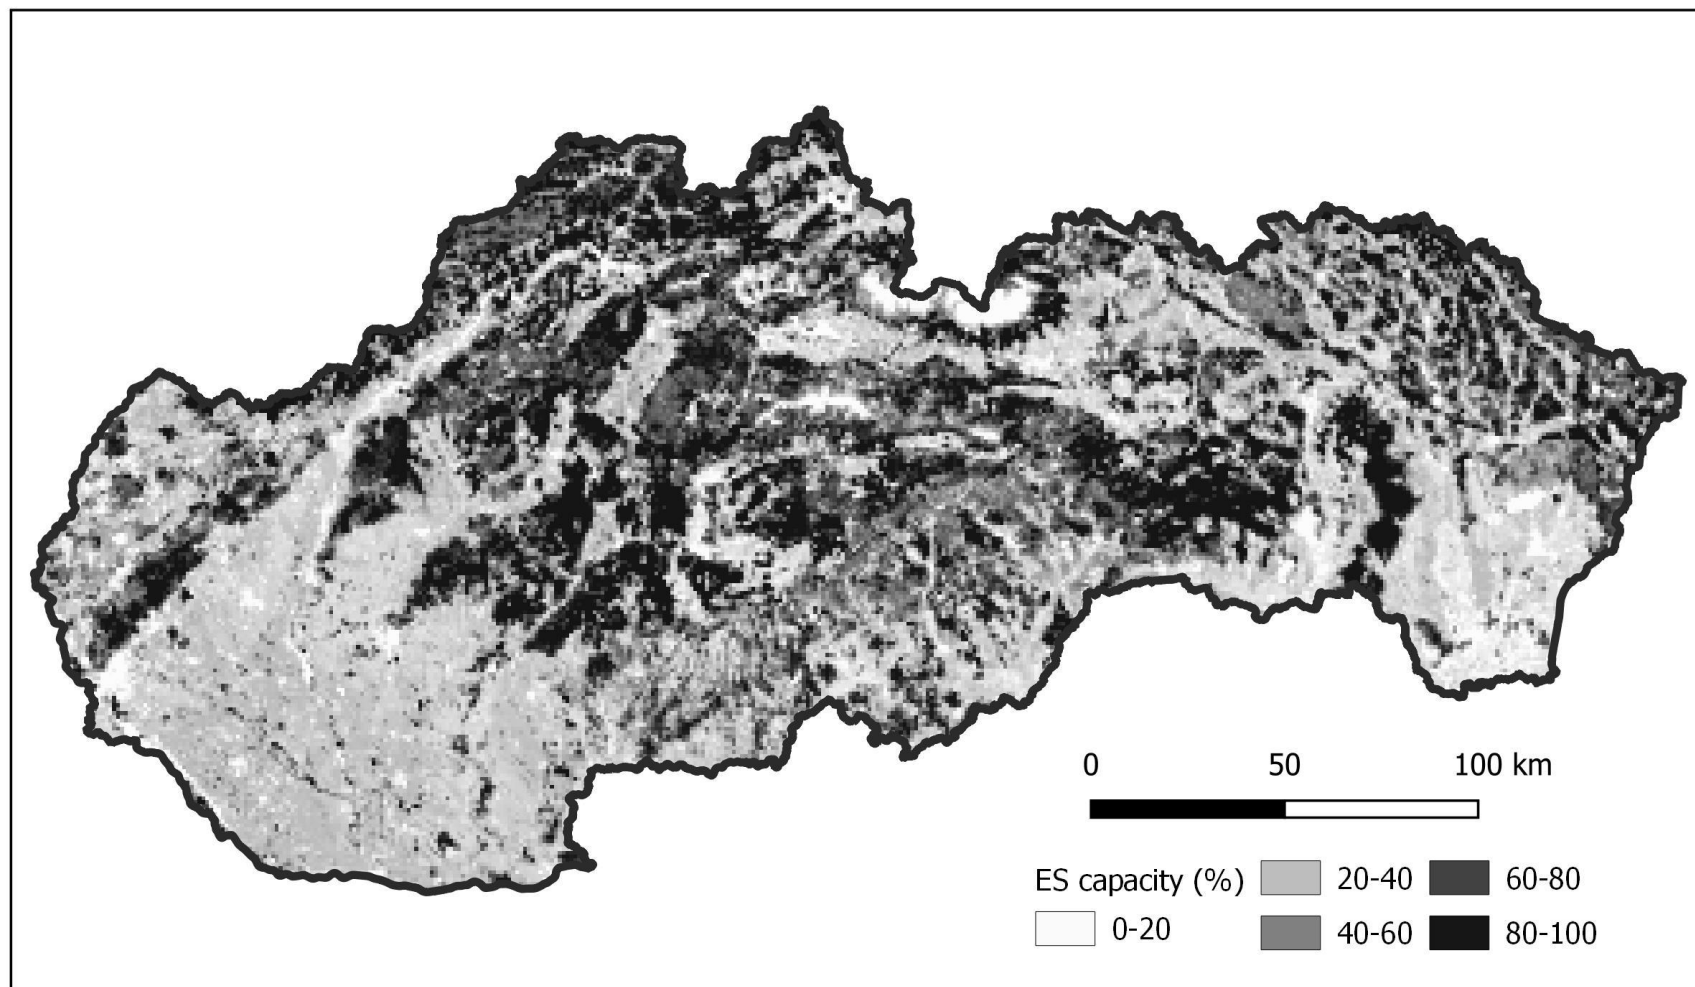

**P02 Timber and fibre**

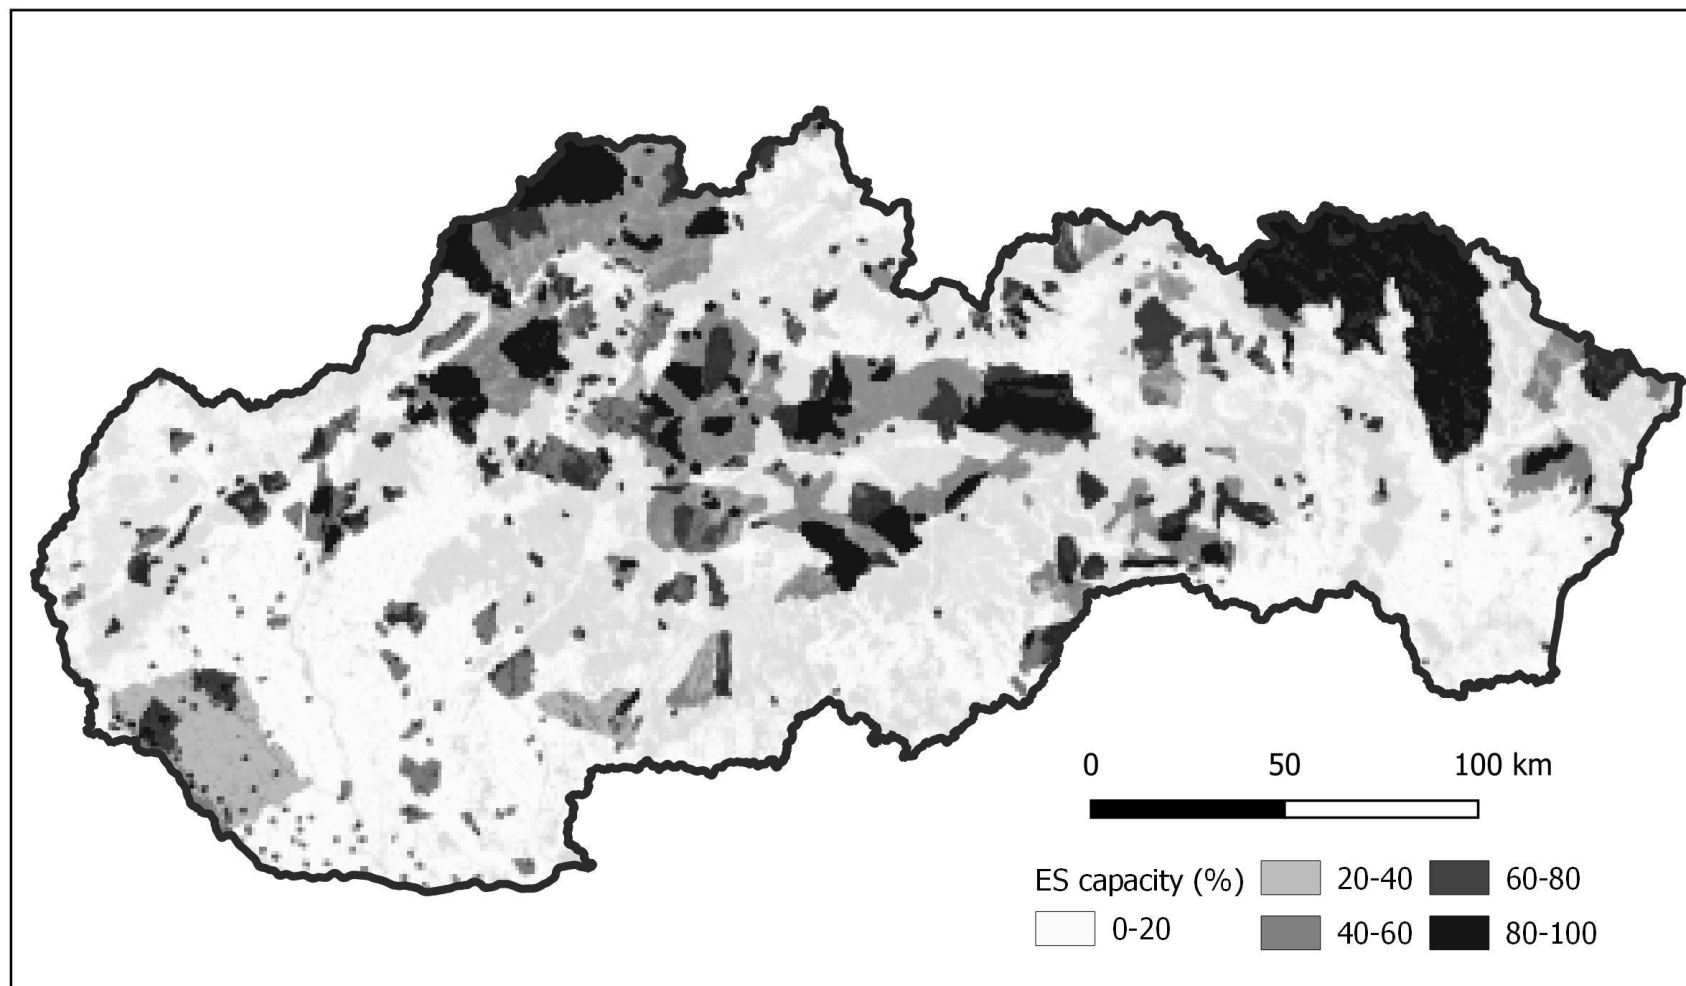

P03 Drinking water



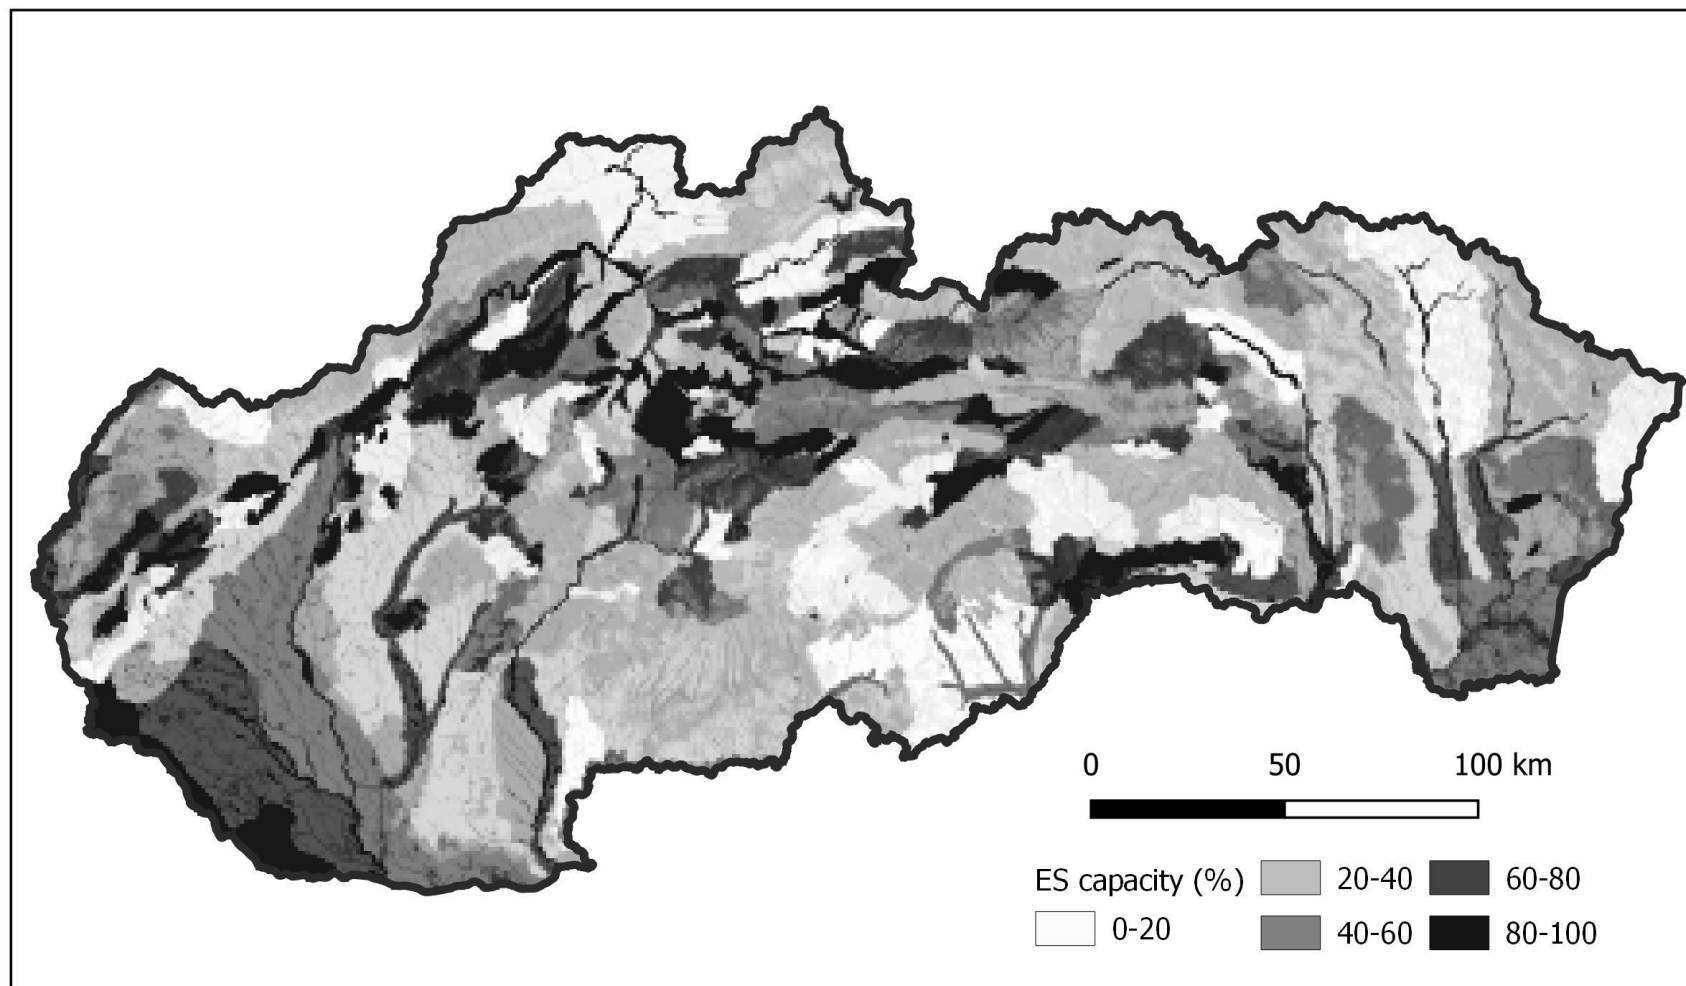

**P04 Freshwater**

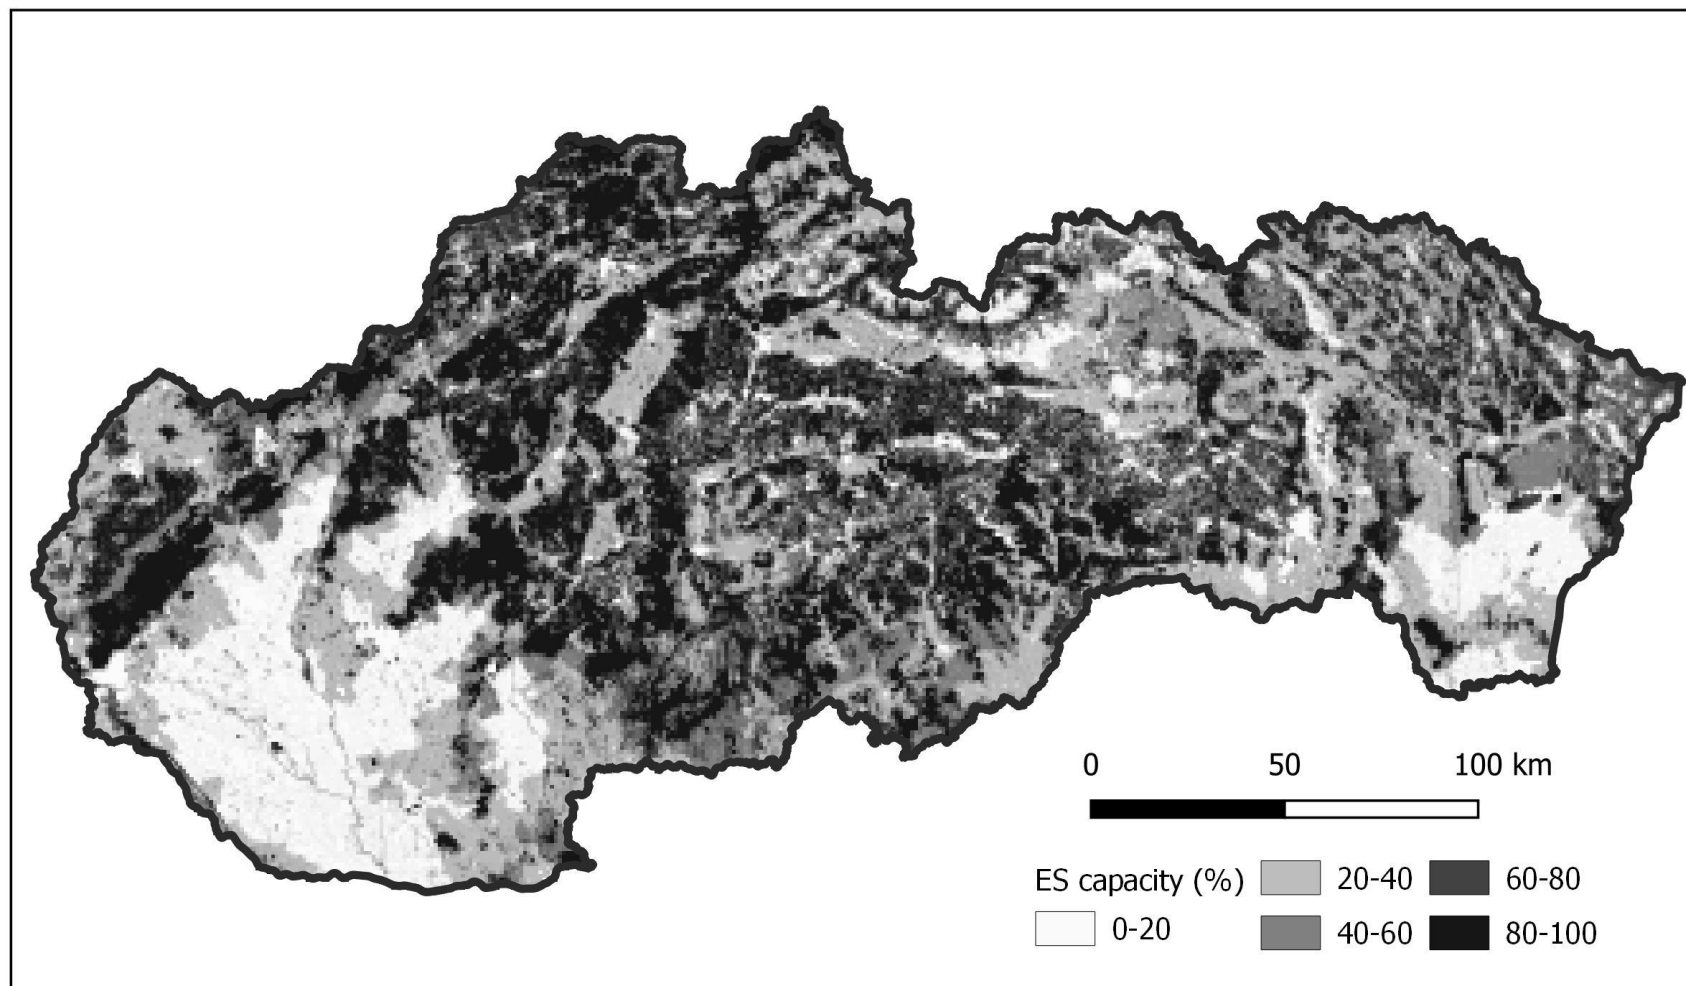

P05 Fish & Game / Wildfood

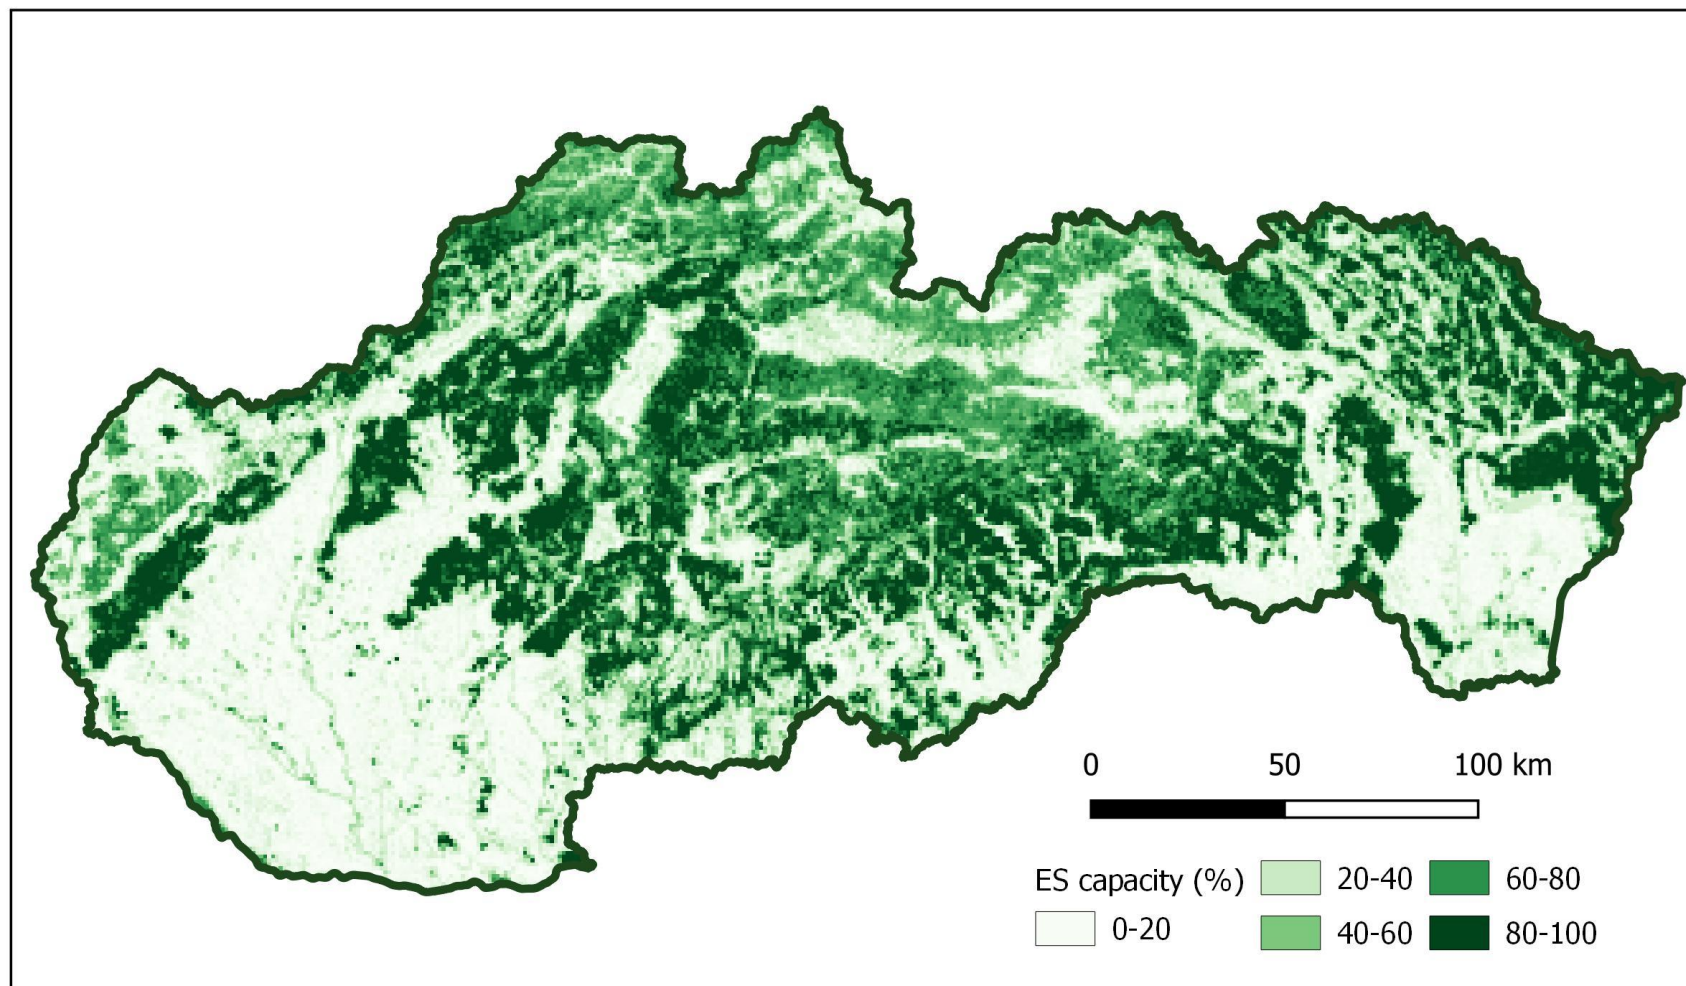

**R01 Air quality regulation**

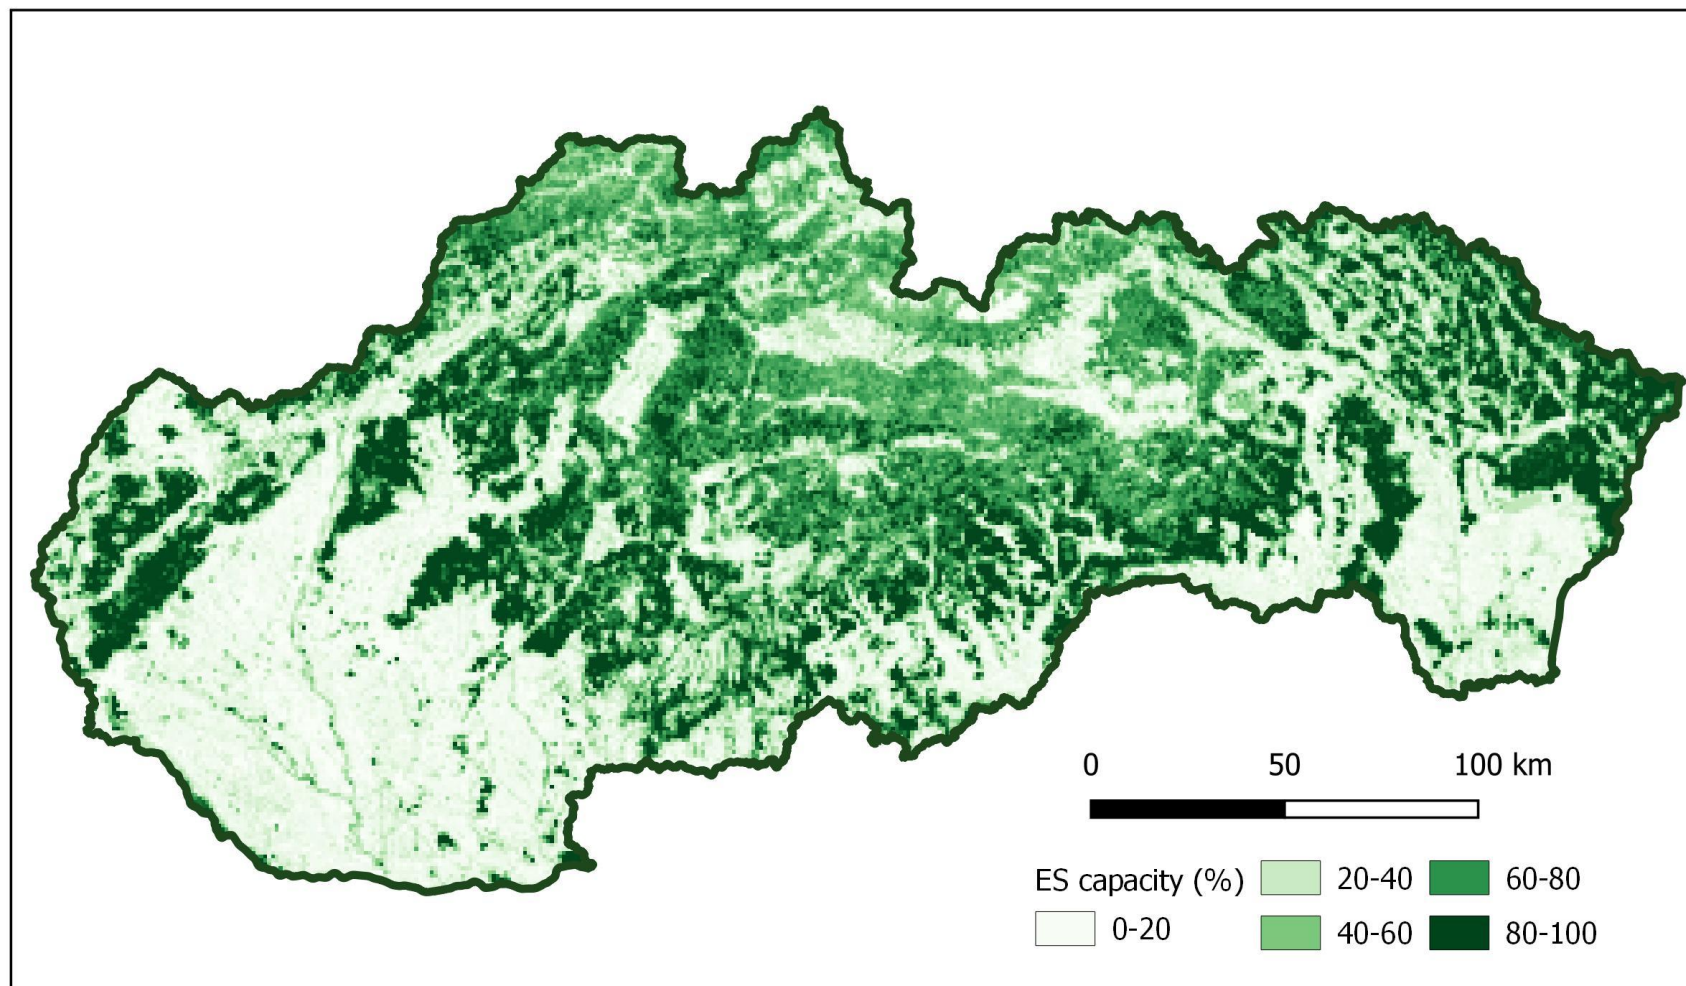

**R02 Water quality regulation**



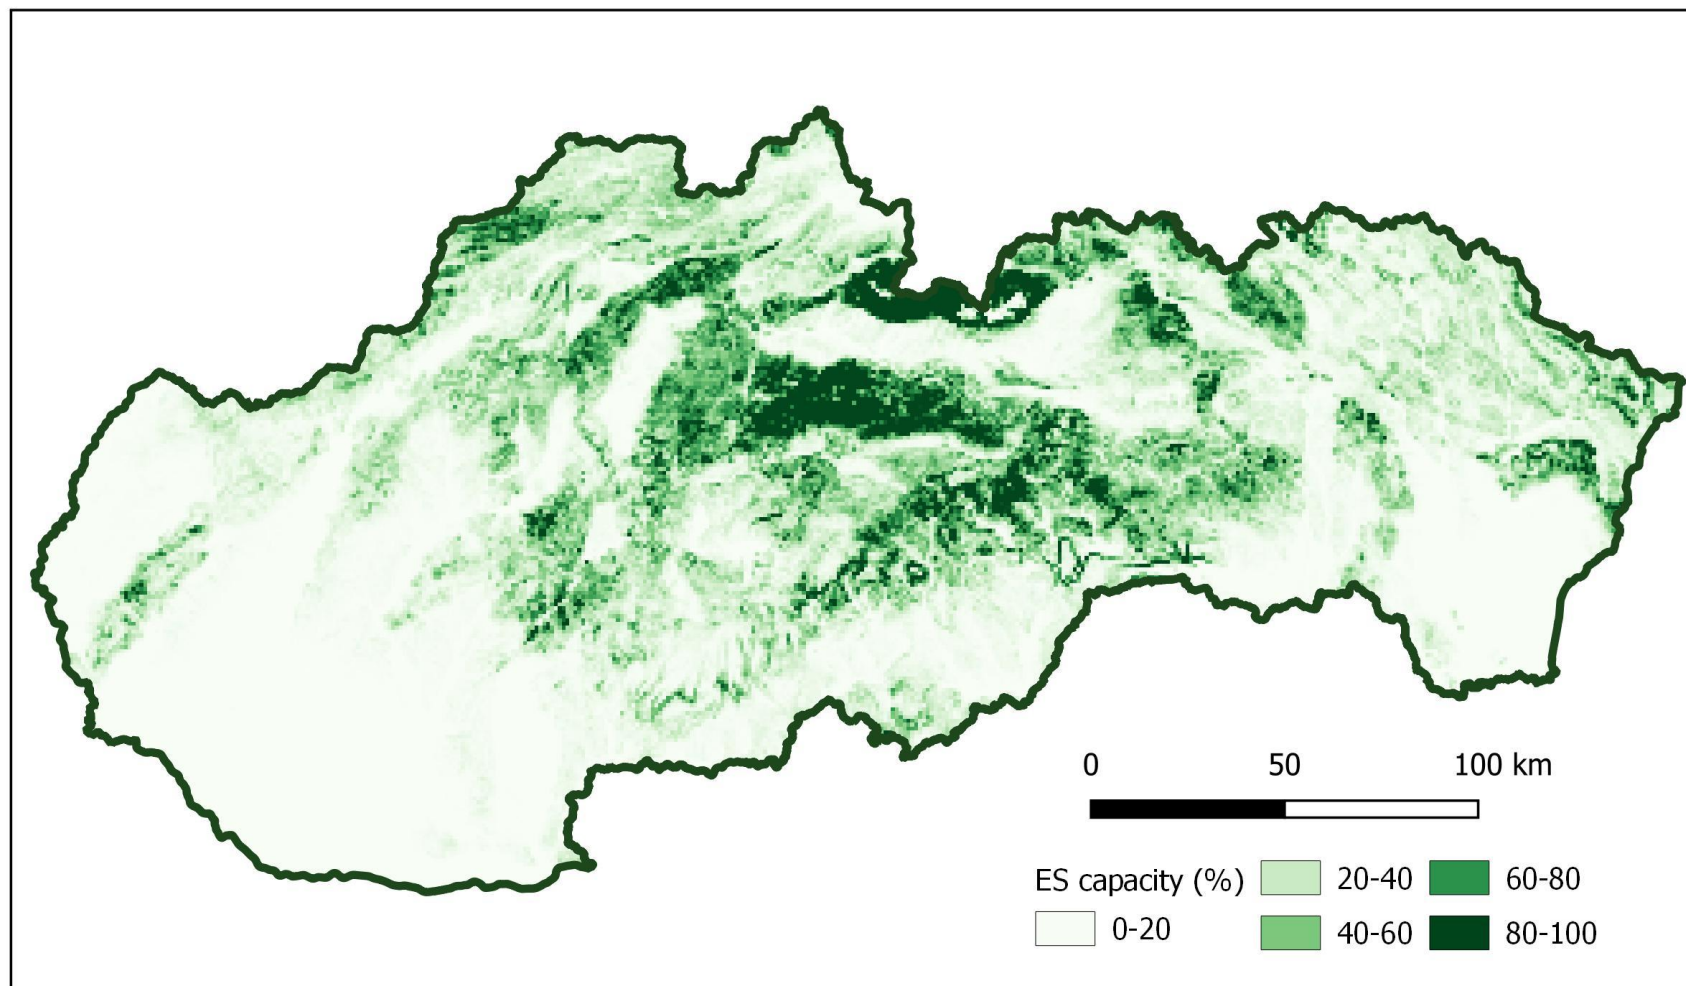

**R03 Erosion & natural hazard regulation**

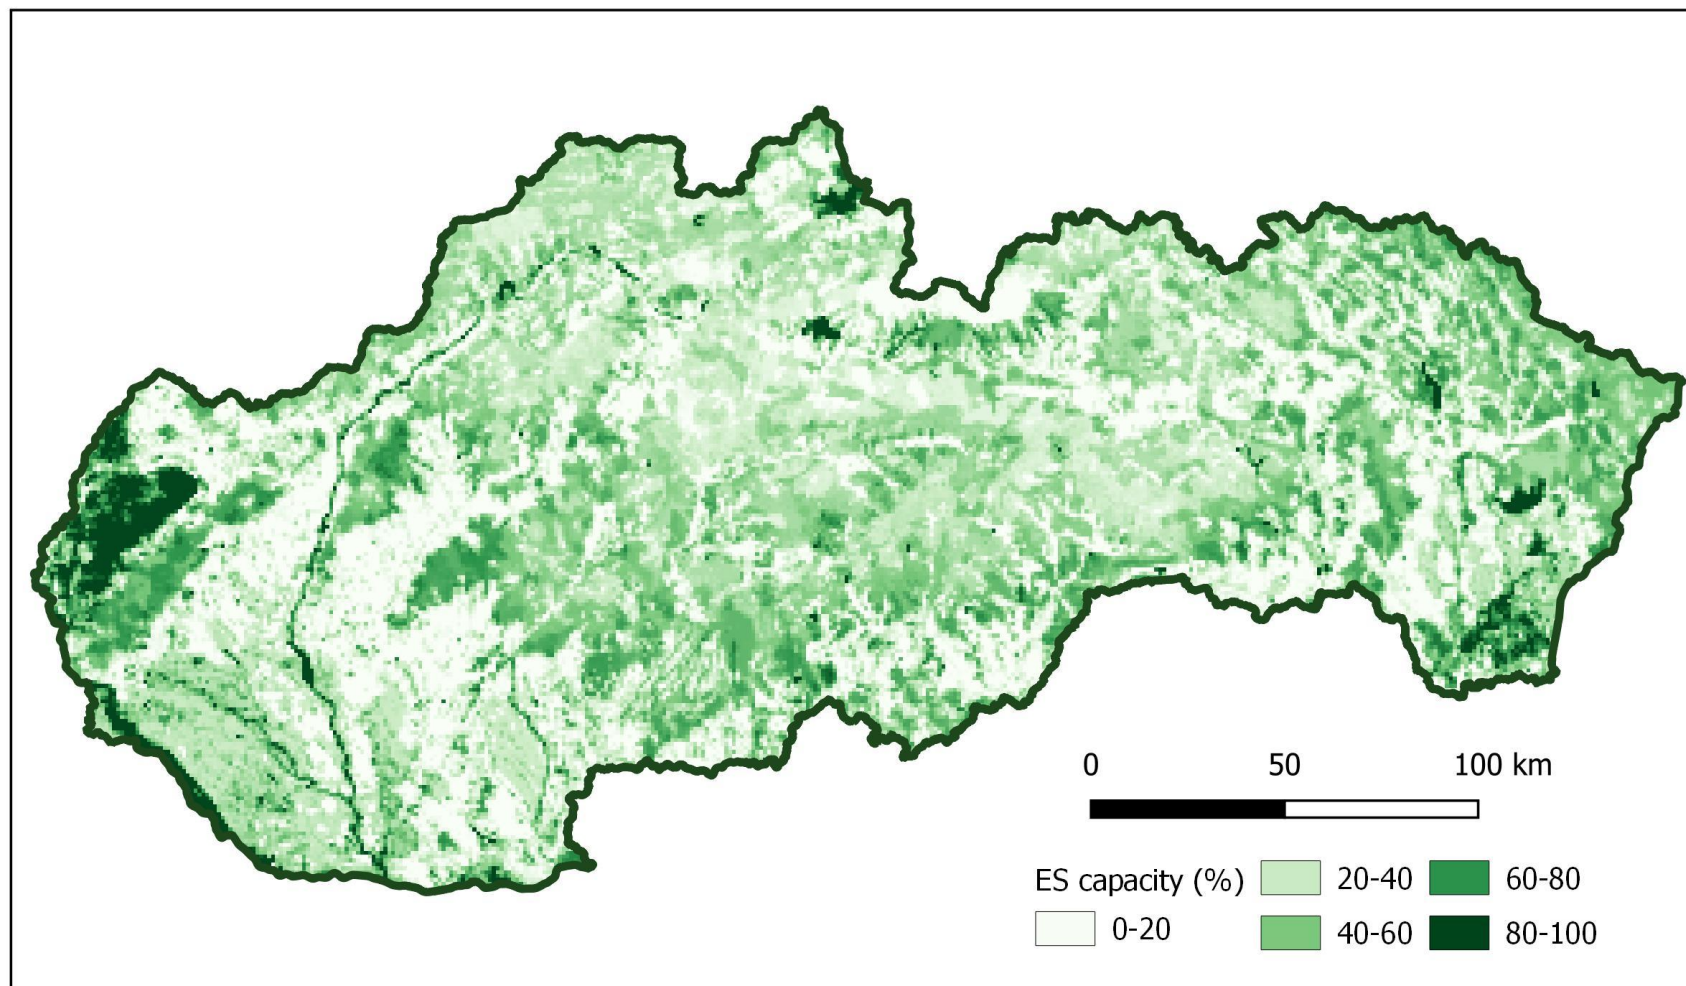

**R04 Water flow regulation**

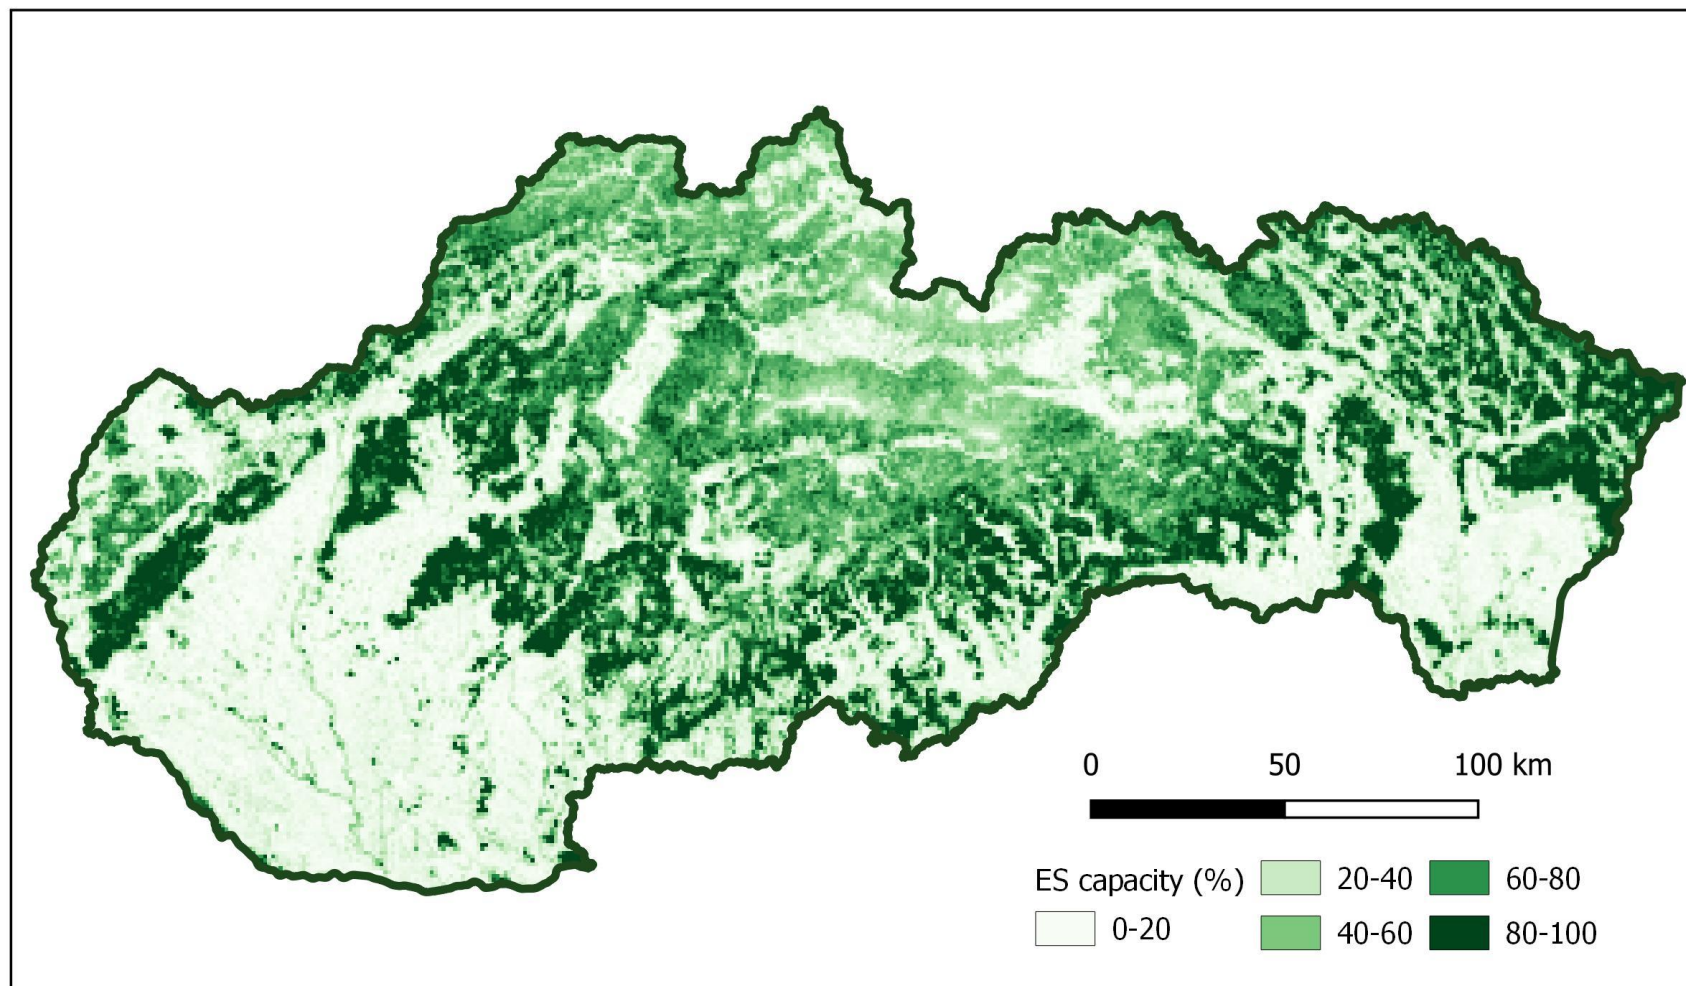

**R05 Local climate regulation**



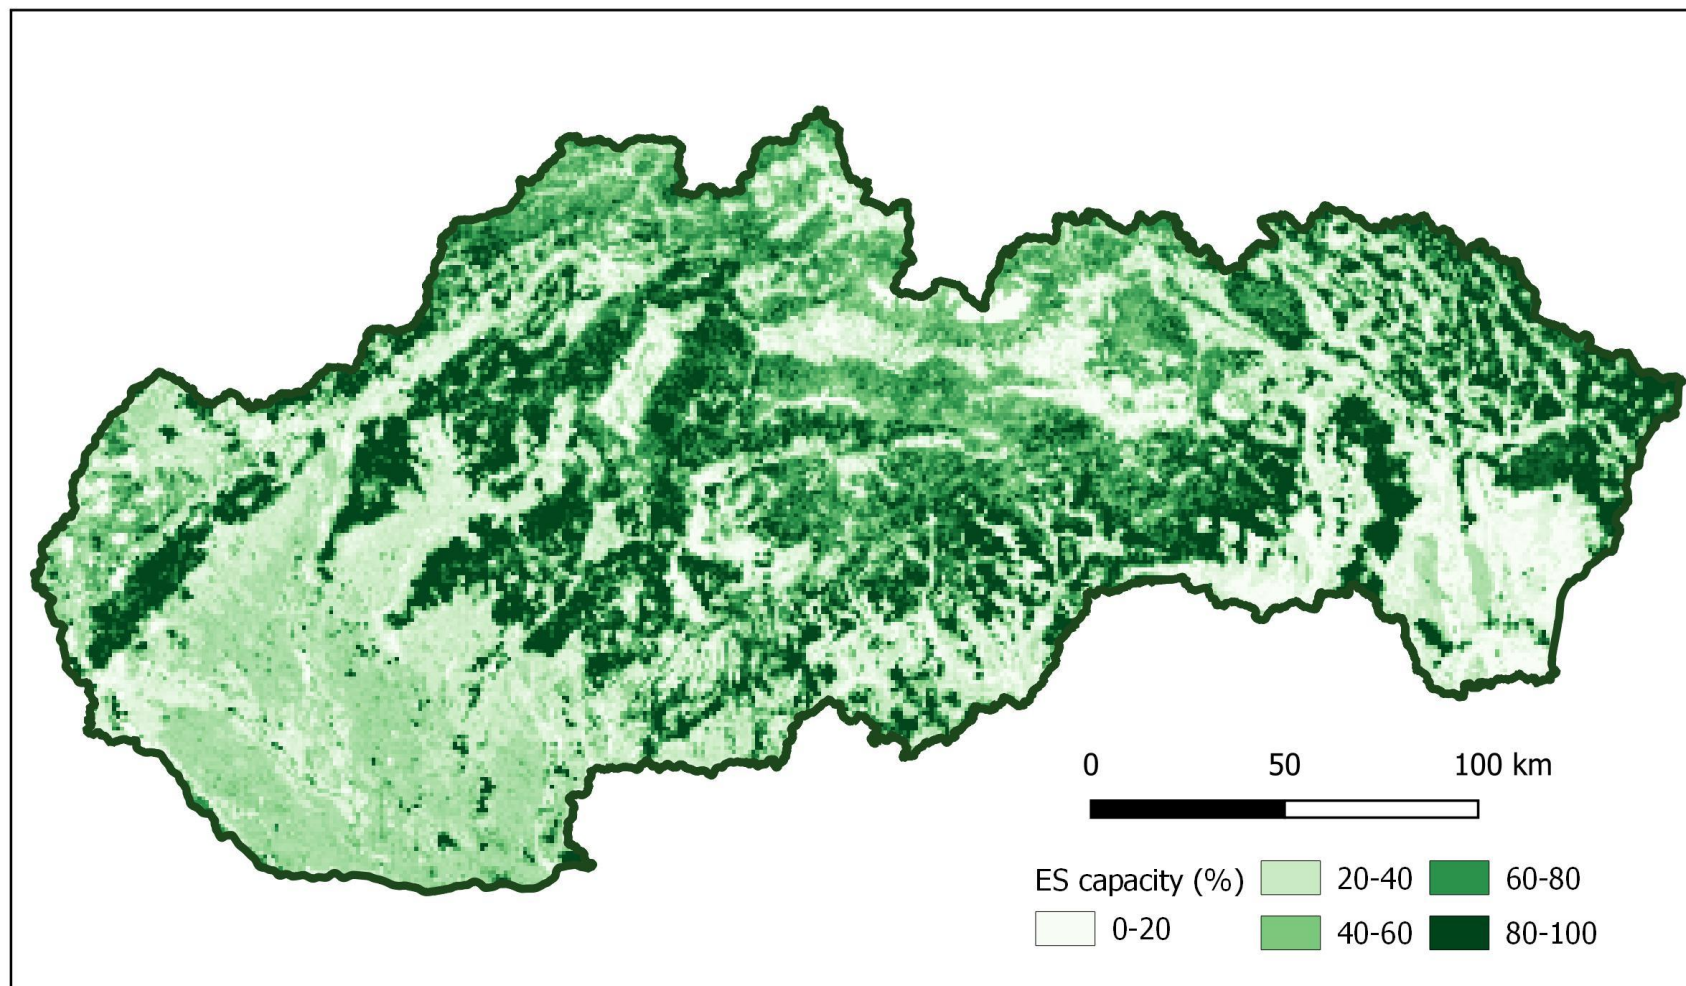

R06 Global climate regulation



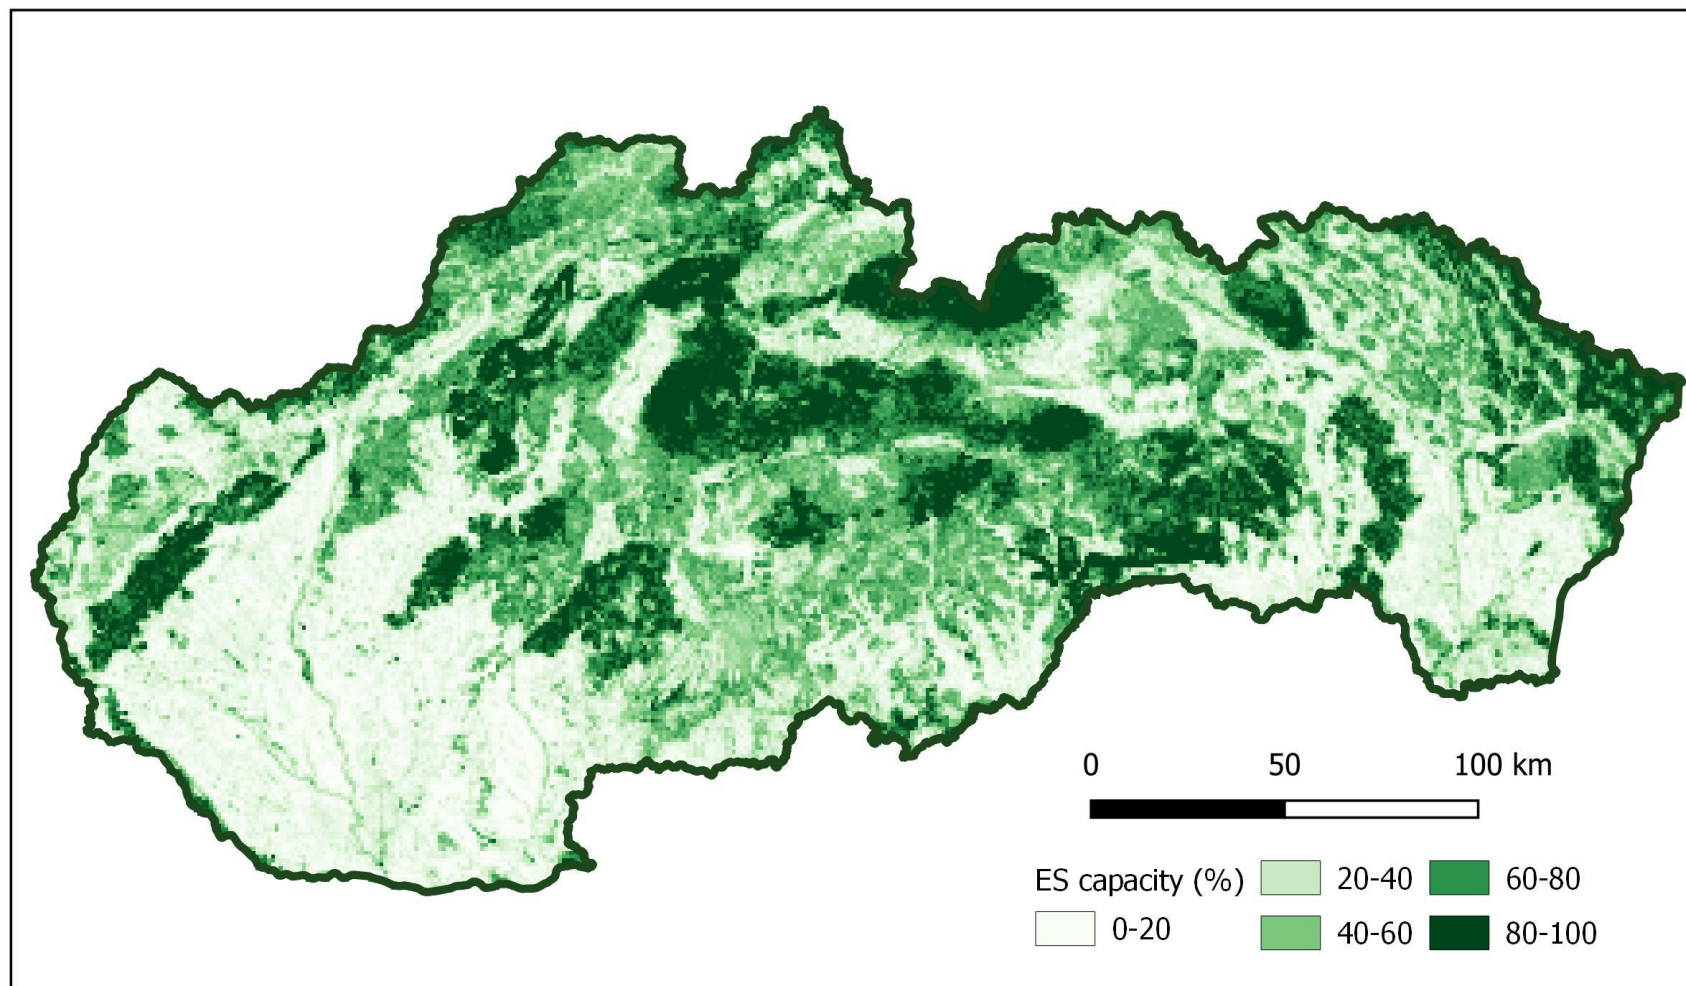

**R07 Biodiversity promotion**

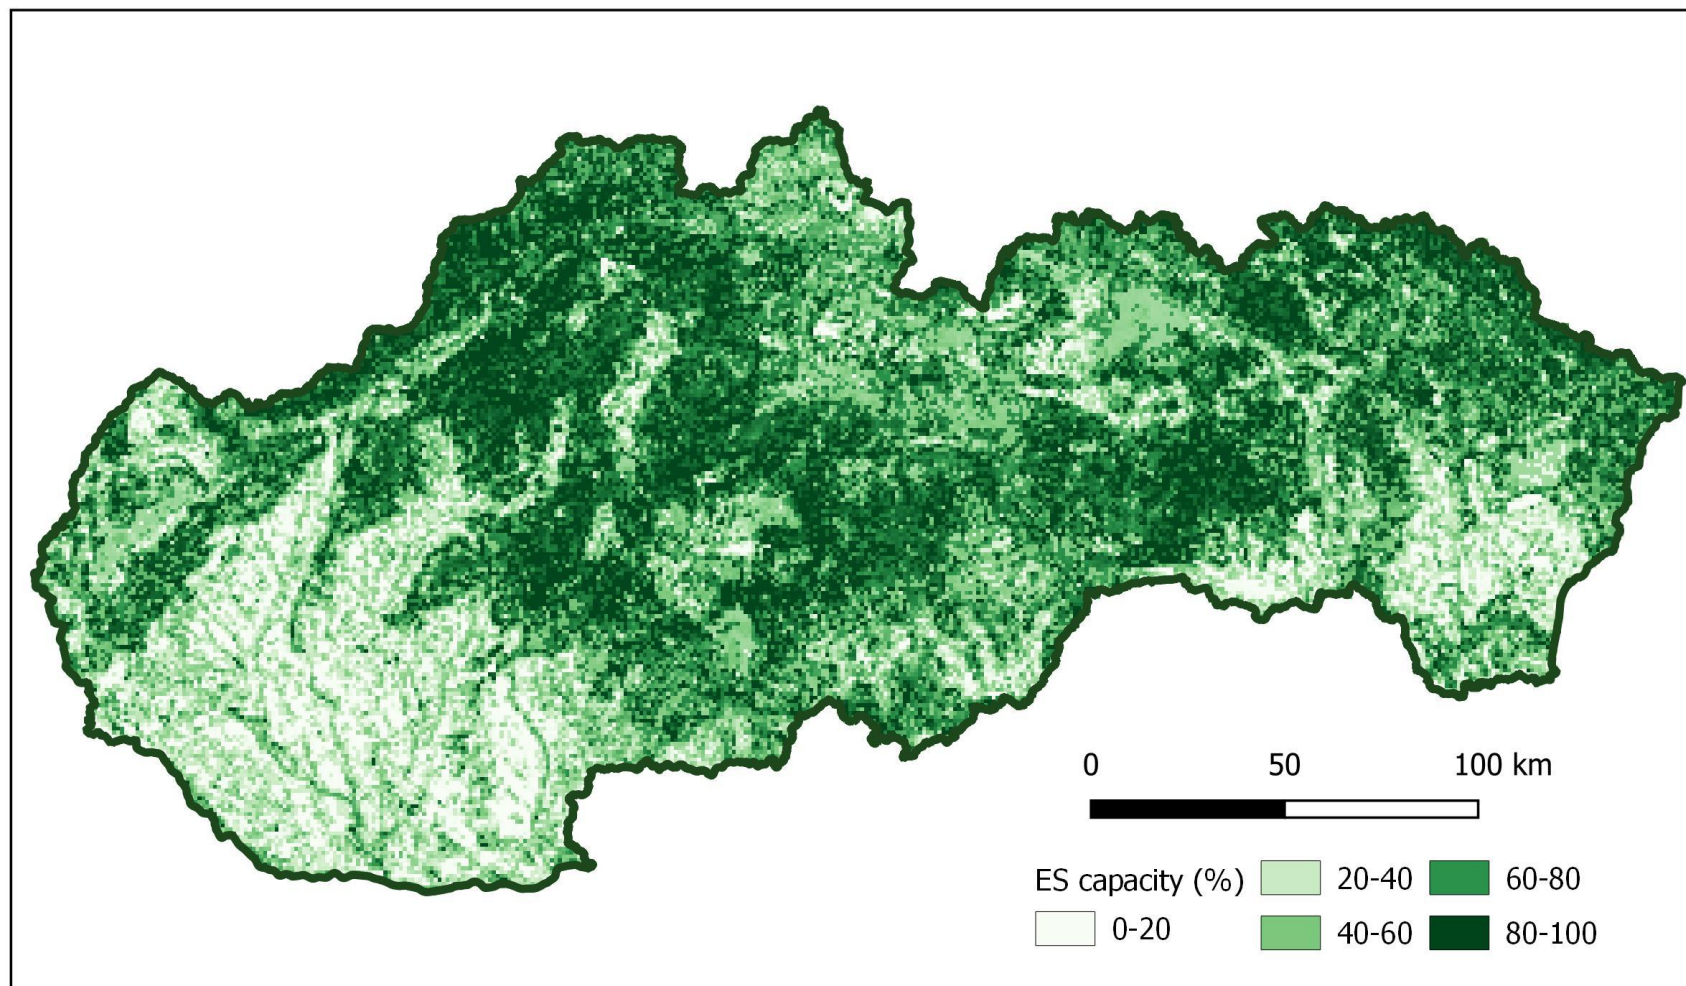

**R08 Pollination**



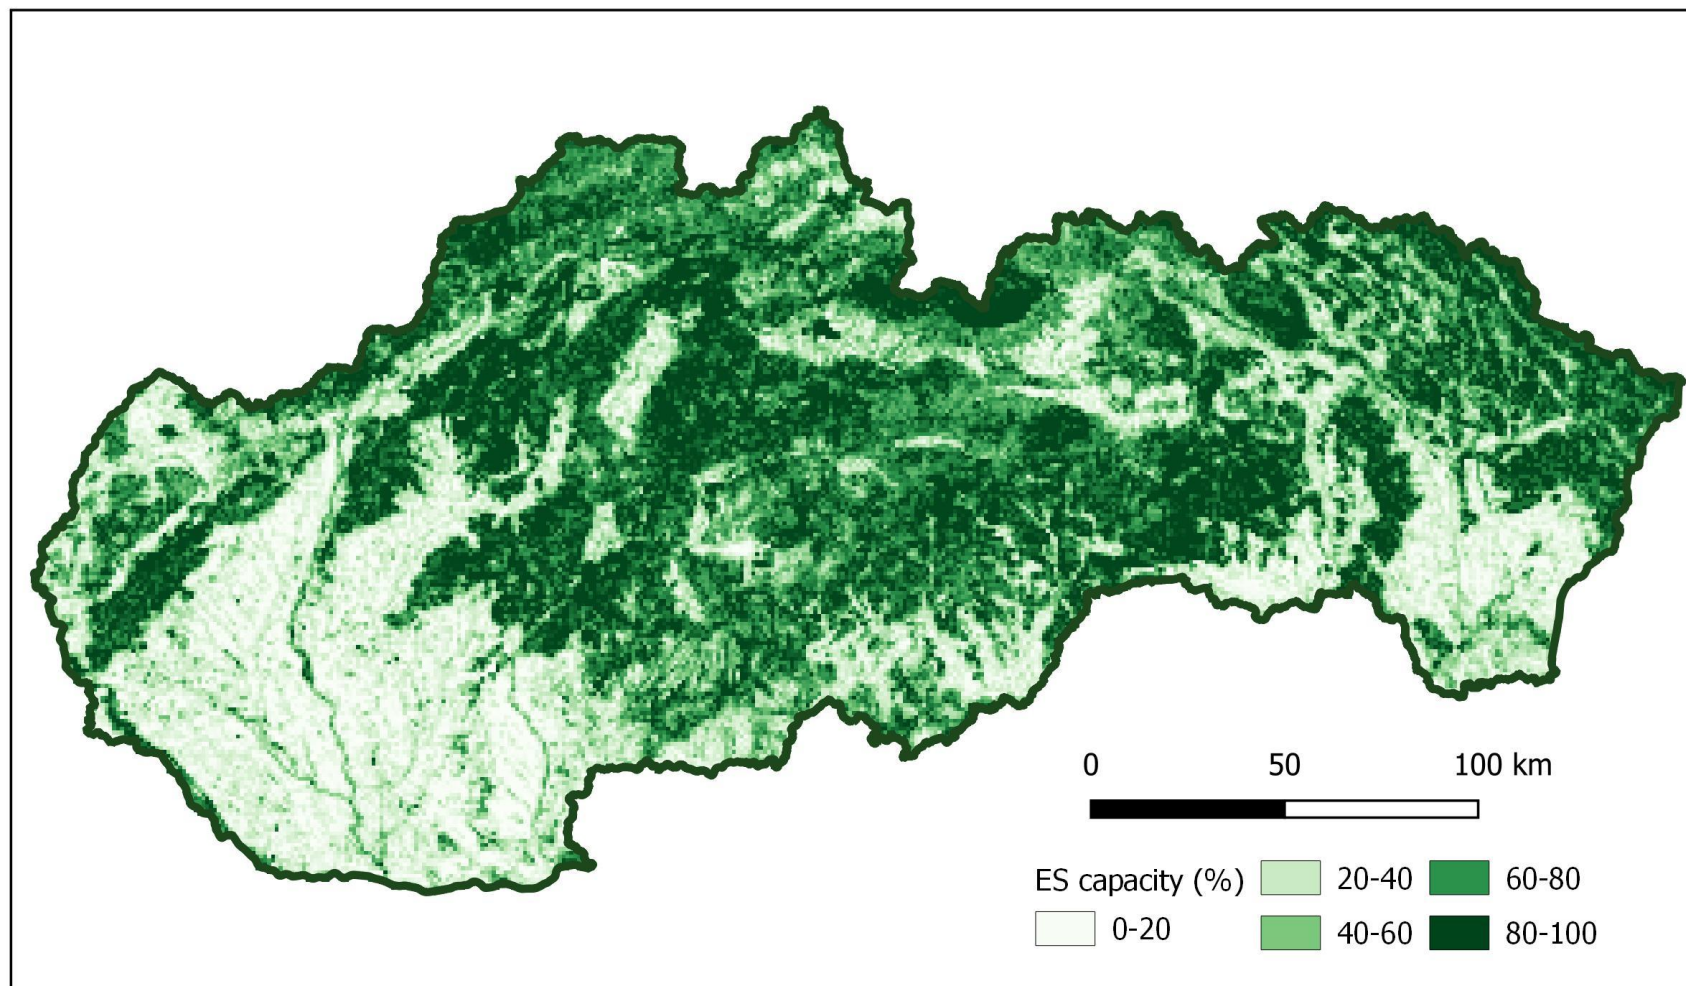

**R09 Pest and disease control**

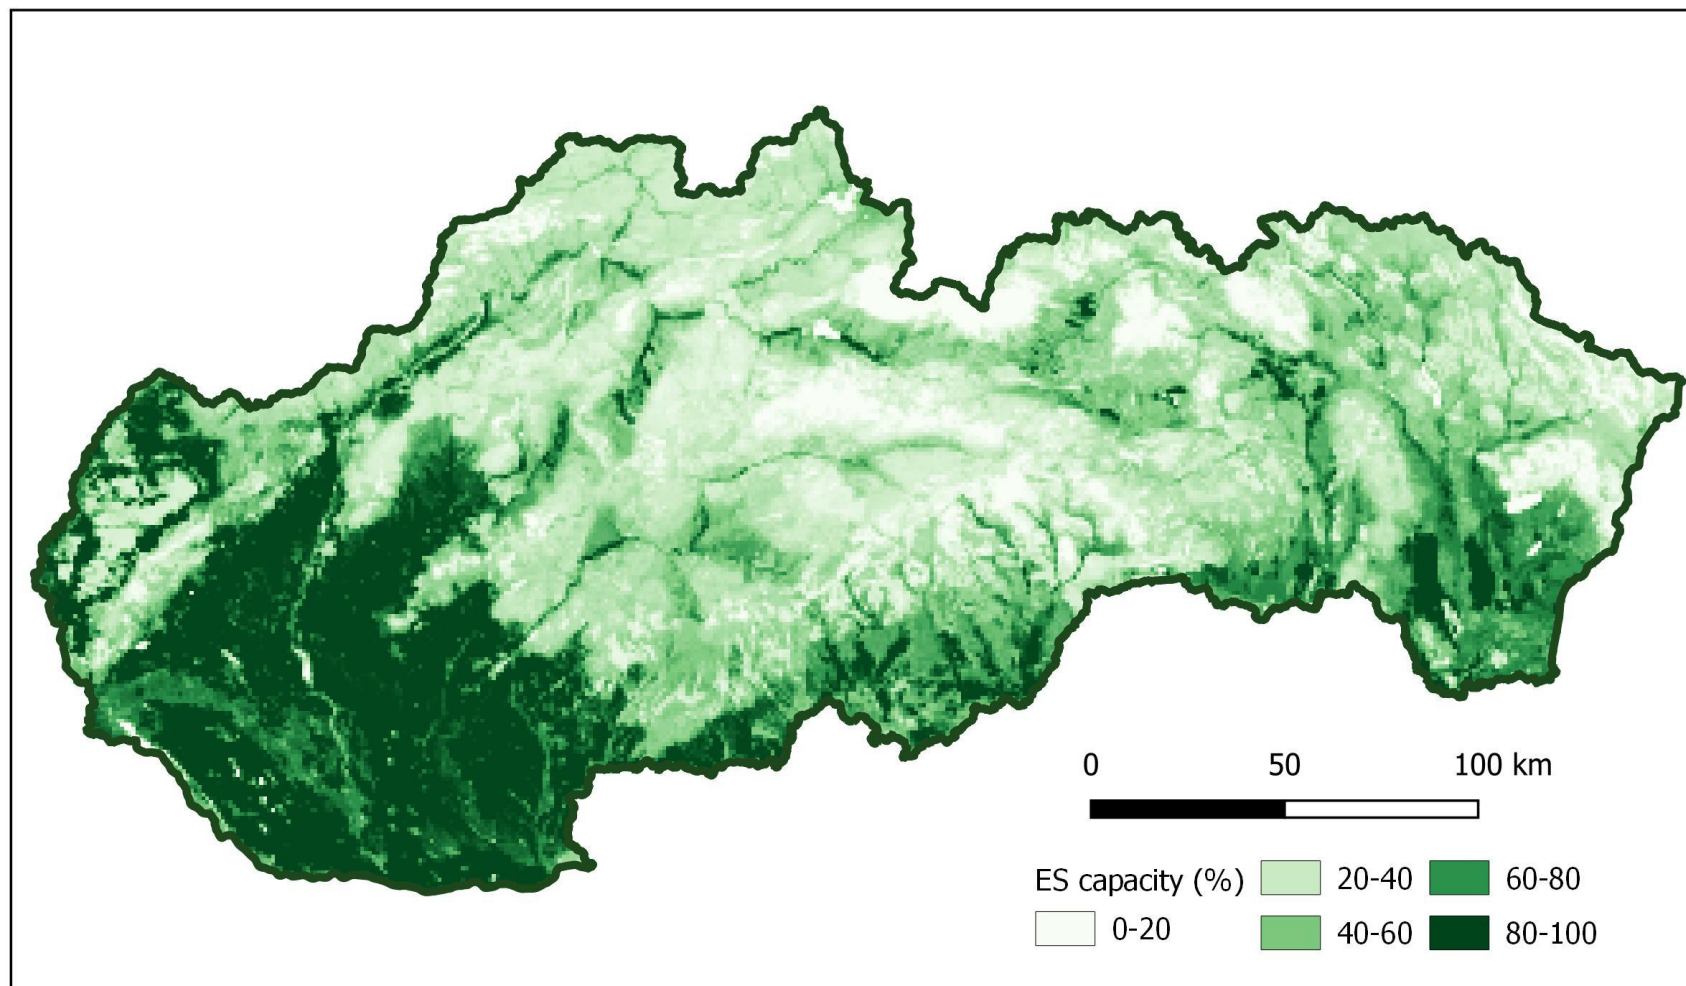

**R10 Soil formation**

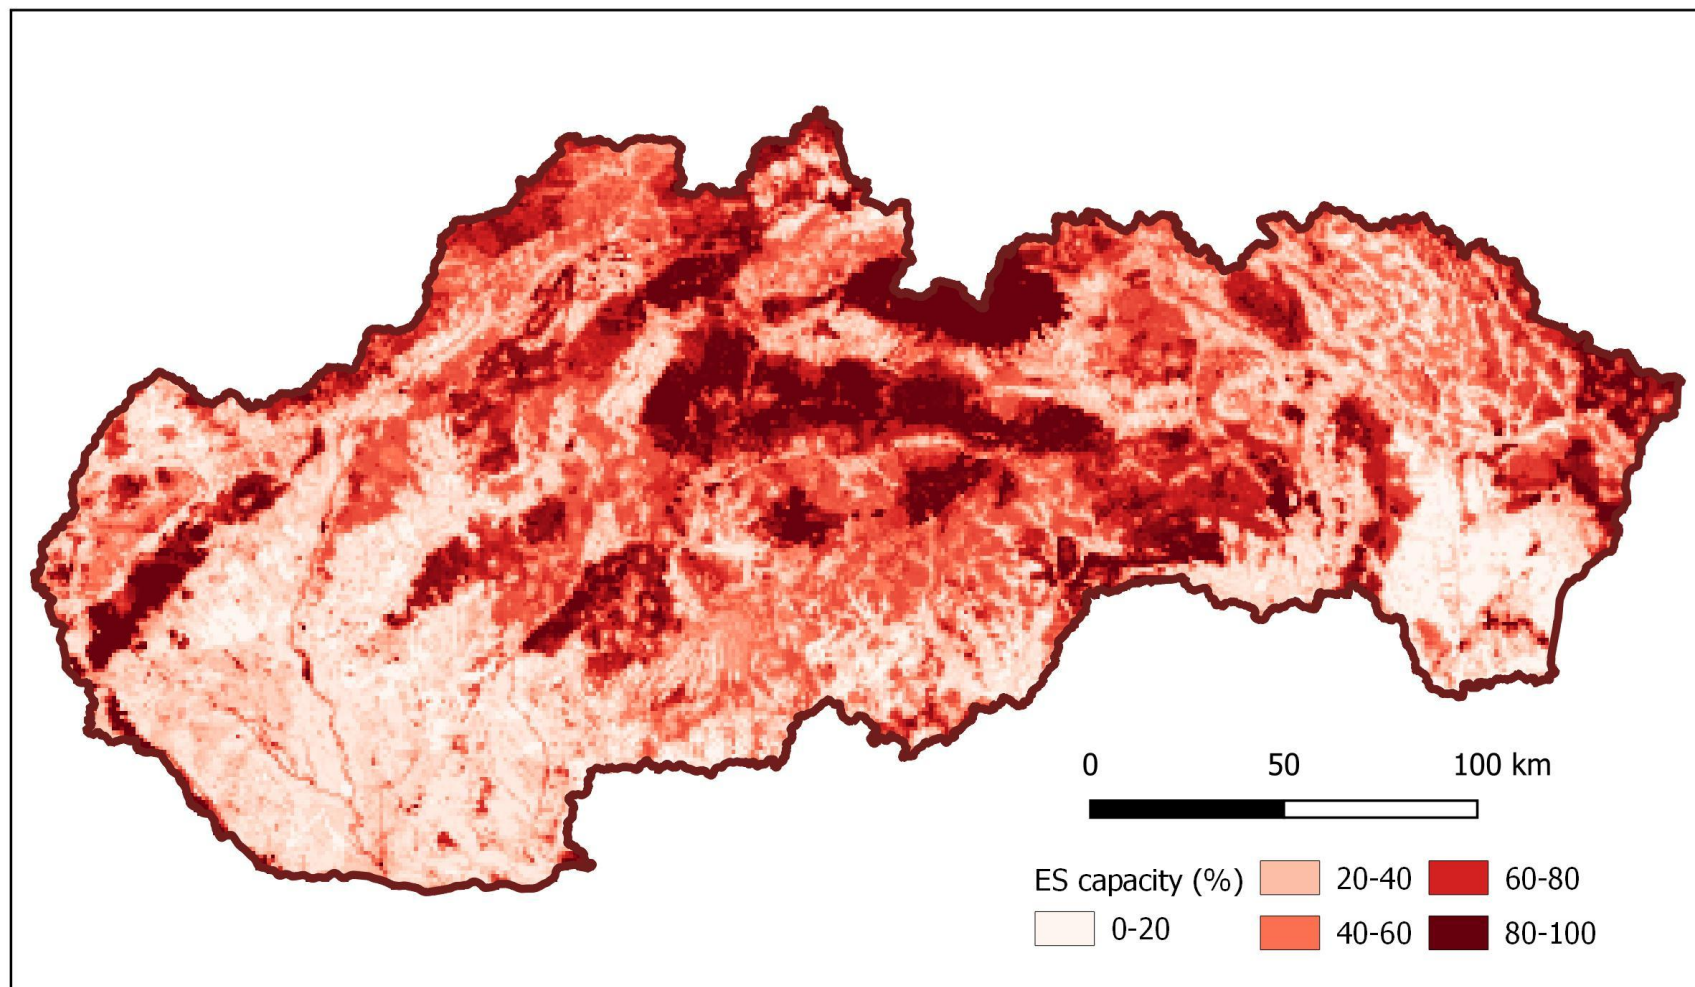

**C01 Recreation and tourism**



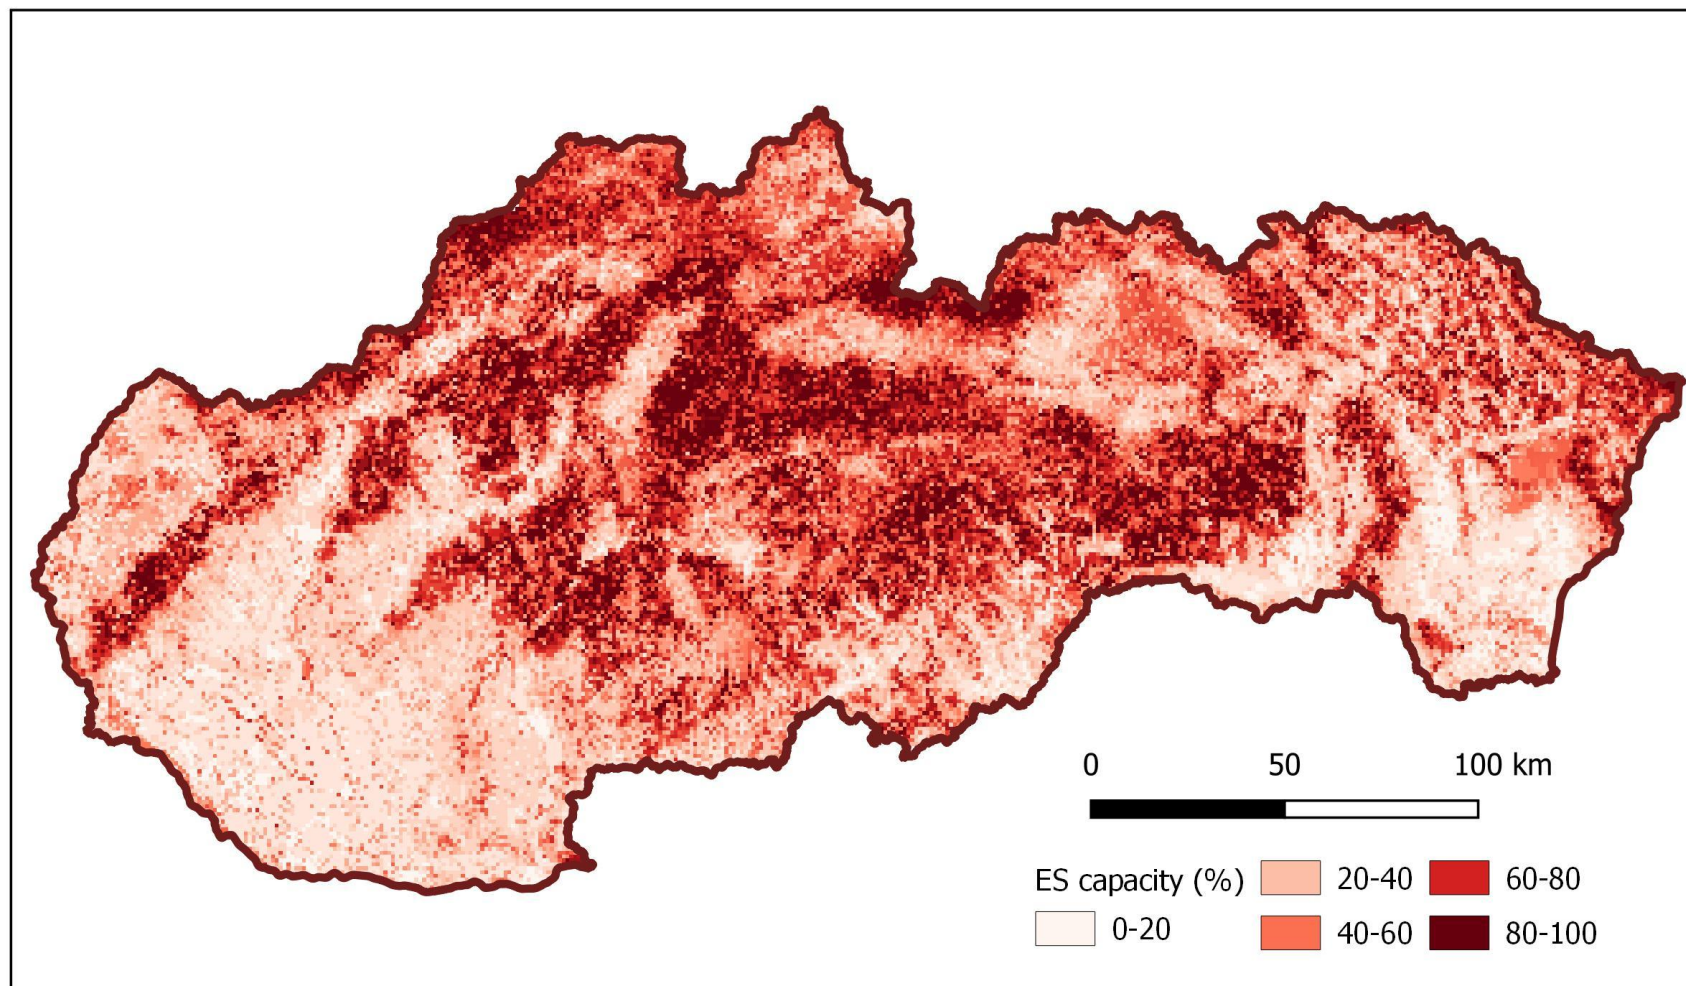

**C02 Landscape aesthetics**

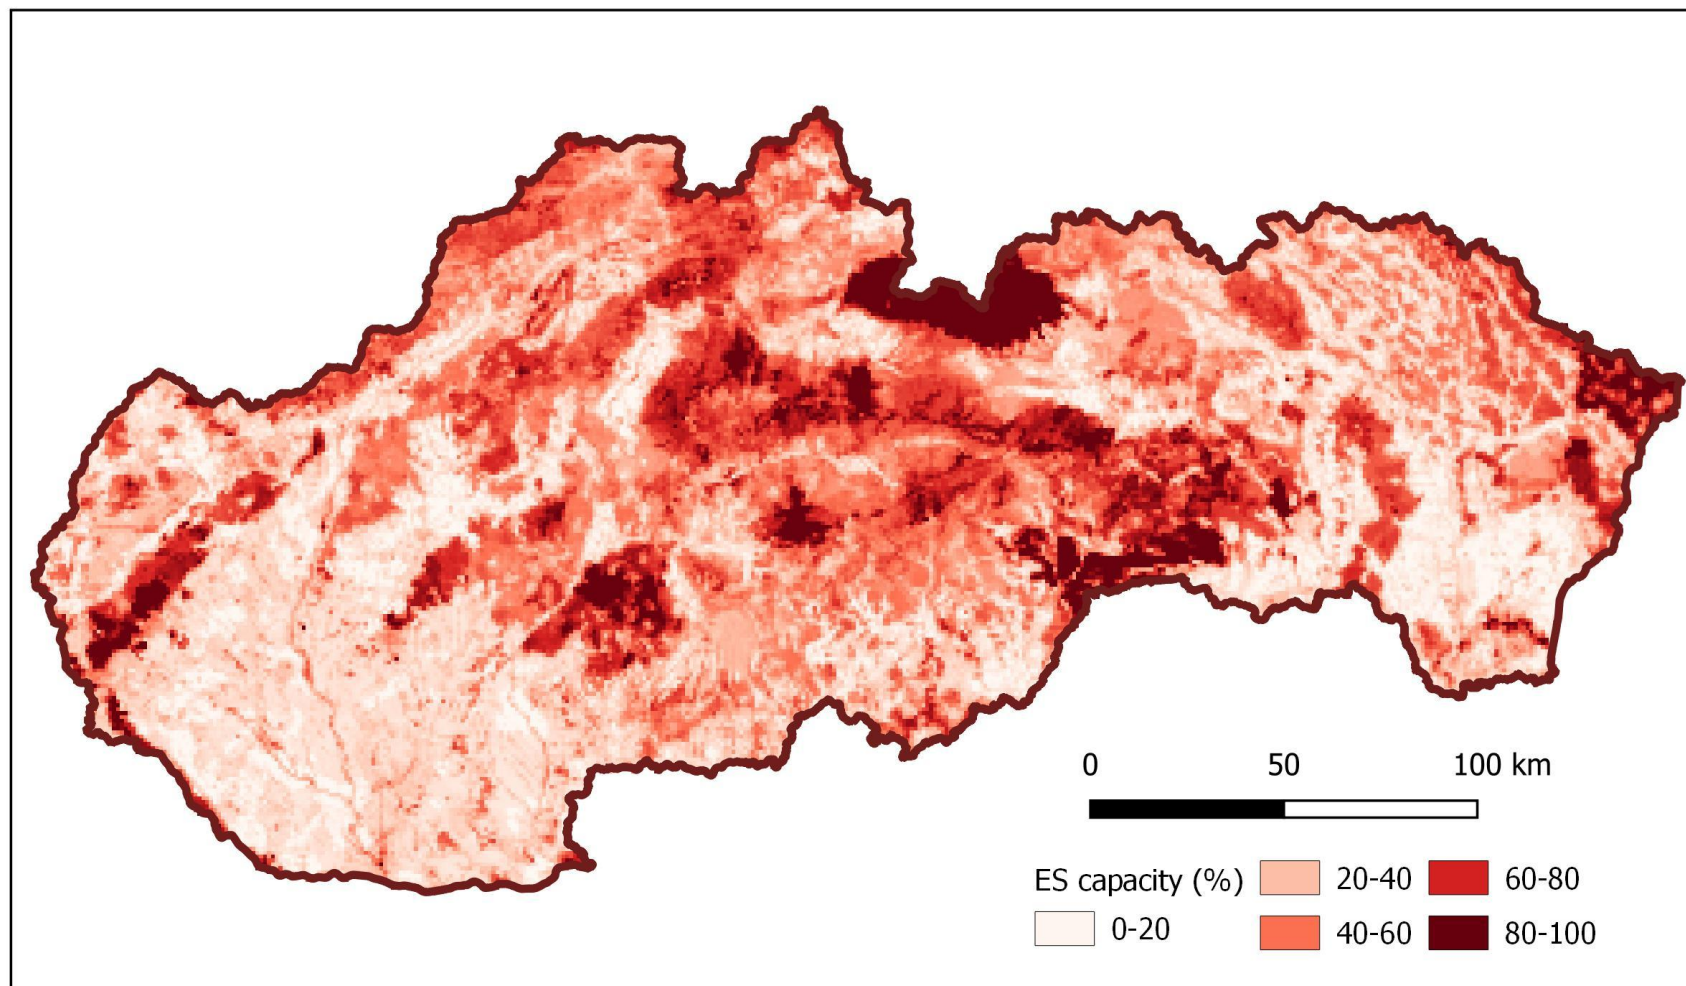

C03 Natural and cultural heritage
